# Supplementary material for: Development and validation of a predictive model for end-stage renal disease risk in patients with diabetic nephropathy confirmed by renal biopsy
Source: PeerJ journal article supplement (doi:10.7717/peerj.8499), 2020-02-11
Supplement: supplemental_files_1.xlsx [file supplemental_files_1.xlsx]

## Sheet: Sheet1
Patients'number	ESRD	RASB use	Glucose lowering drugs use	Statins use	Gender	Age（per 15-year increase）	Duration of DM	Duration of Hypertension	Pathological grade	Hb	CRP	PCT	ESR	HbA1c	Alb	24hUTP	LogACR	TCr	Urea	Scr	UA	CysC	Tcho	TG	HDL	LDL	Serum.lipids	eGFR	PTH	BNP	CK	CKmb	Stnt
1	1	0	1	1	0	2	15	8	4	87	1.84	0.02	99	8.55	24.5	7.46	2.56626	4.13	16.52	239	227	2.66	7.31	1.61	1.82	5.29	0.248	28.576	44.59	2.919	183	23.1	0.053
2	1	0	1	1	1	2	15	28	4	109	0.67	0.036	72	6.9	28.8	3.93	2.56626	6.56	12.7	160	192	2.57	10.06	2.29	1.05	7.98	0.104	21	68.89	16.424	52	19.9	0.01
3	1	1	1	1	1	3	8	17	5	90	2.53	5.65	25	7.1	28.7	11.27	2.46706	5.09	19.65	302	449	3.73	6.92	1.58	1.23	5.3	0.177	21.11	102.7	25	459	15	0.01
4	0	1	1	0	0	3	10	0.2	4	107	0.61	0.07	53	6.2	33.4	5.24	2.57031	4.99	13.8	191.4	302	1.78	5.16	2.13	1.1	3.48	0.213	27.67	56.43	1.48336	83	32	0.013
5	0	1	1	1	1	2	10	0.5	2	118	0.41	0.04	9.9	6.2	42	0.81	0.9154	0.63	9.28	158	380	1.78	2.97	1.38	0.59	1.53	0.198	43.069	64.47	0.46346	81	10	0.021
6	1	1	1	0	1	2	3	1	4	127	0.89	0.2	8.2	8.89	30.4	7.21	2.24348	4.01	6.4	99	334	1.94	7.42	4.3	0.98	4.94	0.132	47.093	28.99	0.2466	80	10	0.02
7	1	1	1	1	0	2	15	1	4	78	0.95	0.044	31	6.3	43.4	2.79	2.16176	2.51	19.7	208	312	2.09	6.17	1.18	1.47	4.18	0.238	29.464	50.94	15.231	64	10.8	0.01
8	0	1	1	1	0	1	7	0	4	99	5	0.01	53	7.9	23.4	8.68	2.83788	8.72	14	100	276	1.39	3.92	0.95	1.43	2.37	0.364	4.75	67.42	6.27777	61	18	0.012
9	0	0	1	1	0	1	4	0	4	133	0.5	0.13	67	5.86	24.6	8.96	2.94301	11.58	8.6	125	273	1.46	8.3	5.38	1.11	5.31	0.133	43.96	37.04	0.3205	198	12.5	0.01
10	1	1	1	1	1	3	10	15	4	114	1.95	0.1	99	8.04	30.4	20.2	2.91675	11.52	13.4	282	367	3.61	6.01	3.08	0.6	4.48	0.099	9	50.6	0.7263	77	15	0.03
11	0	1	1	1	1	2	5	0.5	3	103	0.67	0.053	42	6.7	26.8	8.66	2.72663	6.29	7.84	141	339	1.39	4.51	1.15	0.99	2.95	0.219	72.12	34.59	0.56028	86	14.8	0.01
12	1	1	1	0	0	2	15	1	4	88	0	0.06	40	9.9	28.6	6.11	2.34555	4.73	9.8	132	165	2.23	4.52	1.06	1.36	2.72	0.3	41.71	28.99	0.8743	207	41.4	0.01
13	1	0	1	1	0	2	6	5	4	91	2	0.12	29	6.5	25.3	18	3.11886	22.53	9.8	111	434	1.11	6.35	1.86	1.02	4.38	0.16	77.82	32.3	9.462	59	11	0.057
14	0	1	1	0	0	3	5	0.5	4	109	24.2	0.07	120	8.5	28	7.43	2.97317	13.46	5.4	77	294	2.16	7.81	2.23	1.88	5.17	0.24	42.42	9.9	5.253	92	15.6	0.01
15	0	1	1	1	0	2	18	0	4	78	0.1	0.04	31	11.58	37.2	0.5	1.70122	0.99	7.01	185	235	1.67	3.07	0.54	1.19	1.78	0.387	26.602	40.8	2.74	860	20.4	0.01
16	1	0	1	0	1	3	10	10	4	99	2.2	0.063	28	5.8	37	5.84	2.23877	2.86	18.2	308	280	3.73	3.34	0.66	1.02	1.95	0.305	14.63	48.59	5.072	448	16.7	0.01
17	1	1	1	0	1	2	20	4	5	96	11.79	0.385	13	7	35.1	0.97	1.69557	1.78	23.7	200	396	2.33	3.57	1.05	0.65	2.63	0.182	67.416	168.6	15.231	93	10	0.037
18	1	1	1	1	1	2	18	2	4	86	2.73	0.1	34	6.1	31.5	6.37	2.21524	4.71	5.8	97	432	1.12	4.34	1.51	1.06	2.77	0.244	46.33	27.93	7.453	209	3.27	0.034
19	0	1	1	0	1	3	4	1	4	137	0.4	0.04	36	7.4	41.7	1.49	1.69557	0.64	7.86	95	494	0.89	3.46	2.93	0.74	1.69	0.213	59.351	18.47	2.197	51	15.4	0.01
20	1	1	1	1	0	2	10	10	5	58	0.2	0.07	75	7.39	29.6	12.2	2.55943	7.34	11	215	286	2.09	5.93	2.14	1.13	4.27	0.19	22.64	48.56	0.653	220	11	0.01
21	0	1	1	1	0	1	0.2	0	4	106	0.89	0.2	21	7.3	34.5	5.38	2.58898	6.58	7.2	70	442	1.12	5.08	1.45	1.15	3.22	0.226	80.724	125.8	11.343	233	19.9	0.034
22	1	1	1	1	1	2	25	10	5	108	1.02	0.17	19	8.4	32.9	3.38	2.45117	3.36	17.37	311	386	2.57	6.13	1.7	1.15	4.53	0.187	16.4	57.62	0.653	220	15	0.026
23	0	1	1	1	1	2	10	0	3	154	0.5	0.032	8	11.3	43.3	0.25	1.77393	0.74	3.8	54	277	1.01	4.02	0.85	1.34	2.46	0.333	140.031	22.11	0.03822	53	14.5	0.021
24	0	1	1	0	1	1	3	0	4	134	3.4	0.047	7.9	8.4	40.5	2.95	2.35501	2.4	5.4	102	320	1.14	4.86	2.4	0.88	3.23	0.181	79.39	28.2	0.06	72	14.8	0.01
25	0	0	1	1	0	2	1	0	4	112	1.59	0.05	72	10.2	28.8	4.05	2.46635	3.94	4.9	68	208	1.12	7.75	1.83	1.39	5.47	0.184	82.882	30.7	0.61	72	9.7	0.01
26	0	1	0	0	0	3	10	10	3	127.6	0	0.06	57	9.2	39.3	2.05	2.24348	1.89	6.7	92	274	1.25	6.8	2.22	1.71	5.11	0.259	73.26	107.9	0.135	94	9.7	0.043
27	0	0	0	1	1	2	18	10	3	136	0.1	0.04	16	9.9	31.2	2.34	2.21833	1	5.9	62	260	2.09	5.12	1.7	0.86	3.52	0.167	108.007	34.8	0.431	52	10	0.01
28	0	0	0	1	0	2	8	0.3	4	87	0.07	0.04	30	11.6	28.4	3.58	2.52477	5.68	9.74	81	386	1.22	6.27	0.94	1.86	4.06	0.296	73.19	57.33	4.979	60	9.7	0.05
29	0	1	0	0	1	2	5	3	3	147	0.7	0.04	10	6.5	46.2	3.19	1.76597	1.1	5.7	88	276	1.12	3.53	2.46	0.71	2.12	0.201	89.721	34.8	0.293	575	18.8	0.01
30	1	0	1	0	0	2	3	0	4	84	1.58	0.04	105	6.88	23.7	13.51	2.9335	11.31	6.66	113	257	2.16	5.98	2.36	0.86	3.62	0.143	70.84	29.56	0.05167	448	15.6	0.01
31	1	1	0	0	1	2	8	0.1	5	90	0.1	0.23	19	5.92	23.4	19.66	2.72663	8.28	10.7	143	337	1.25	4.58	1.2	1.17	3.13	0.3	59.351	62.12	0.384	295.4	12.8	0.035
32	1	0	1	0	1	2	13	2	4	94	0.3	0.783	84	6	29.1	12.05	2.6399	7.51	23.66	643	292	4.34	6.68	1.43	2.14	4.26	0.32	7.5	182.7	5.043	189	12	0.01
33	0	1	0	0	0	2	20	18	4	140	1.5	0.02	6.5	9.1	42.6	0.86	0.983626	0.19	5.44	53	253	0.82	5.12	0.56	1.69	3.37	0.33	107.401	67.75	0.1975	112	26	0.01
34	0	1	0	0	1	1	3	0	4	112	3.45	0.035	59	10.6	30.8	5.84	2.24551	7.51	4.09	83	342	0.83	4.96	2.31	1.3	2.8	0.262	103.304	56.19	0.1975	66	18	0.01
35	0	1	1	0	1	2	3	0	2	167	55.354	0.1	42	12.53	30.7	2.17	1.22968	0.17	6.5	90	171	1.23	4.5	1.67	1.01	2.55	0.224	85.5	25.03	0.2274	197	28.4	0.007
36	1	0	0	1	0	2	0.5	0.5	4	98	0.2	0.04	25	6.2	29	4.3	2.69654	8.28	12.3	149	425	2.08	5.45	2.36	0.79	3.56	0.144	35.77	99.4	12.308	134	11	0.108
37	1	1	0	0	1	3	2	0	4	60	1.67	0.375	18	6.6	34.2	3.46	2.48276	3.73	16.74	241	538	2.59	4.36	0.81	0.99	3.18	0.227	30.76	74.23	0.05281	77	10	0.03
38	1	1	1	0	0	2	15	6	5	118	0.7	0.2	39	10.3	36.2	2.1	2.0306	1.79	10.2	120	515	1.94	5.81	2.76	0.94	4.21	0.161	43.629	43.66	1.81892	78	28	0.041
39	0	0	1	1	1	2	3	3	2	136	2.8	0.09	23	9.5	46.9	1	1.24279	9.12	4.4	71	488	1.59	2.5	3.66	0.81	0.89	0.324	90.916	45.56	1.123	209	12	0.007
40	0	0	1	0	1	2	7	2	3	149	0.92	0.1	7.9	7.2	47	0.31	1.07518	0.24	5.54	81	535	1.23	2.89	1.64	0.69	1.62	0.238	99.877	34.8	0.005	50	9.2	0.003
41	1	1	1	1	1	2	6	18	3	120	2.03	0.2	84	7.62	35.6	10.36	2.78725	8.34	15.55	231	383	3.48	6.81	8.89	0.71	2.43	0.104	11.125	204.5	0.4486	149	8.6	0.037
42	0	0	0	0	0	1	4	0.1	4	76	5.2	0.04	73	10.1	35.4	2.16	2.31706	1.79	5.08	53	395	1.08	6.59	2.65	1.25	4.48	0.189	79.47	17.7	0.8824	160	17	0.01
43	1	1	0	1	0	3	20	0.1	4	102	0.27	0.03	45	8.6	28.1	8.42	3.20797	75.1	11.07	79	331	1.26	5.54	1.24	1.43	3.77	0.258	67.416	74.76	1.09309	53	13.1	0.02
44	0	1	1	1	0	2	8	0	4	125	0.5	0.04	21	10.82	28.2	2.15	2.52477	4.91	4.75	60	311	1.05	5.26	3.29	0.66	3.49	0.125	122.94	15.96	1.014	153	20.1	0.01
45	1	1	0	0	1	3	18	15	3	140	0	0.04	5	7.5	43.9	0.23	0.311754	0.12	9.3	148	416	2.29	5.13	1.47	0.86	4.08	0.167	43.069	57.13	0.05167	52	11	0.012
46	0	1	0	0	1	1	1	1	4	136	3.8	0.07	27	7.6	28.9	2.4	2.19226	2.17	8.1	57	215	1.49	3.62	1.89	0.82	1.89	0.226	70.84	125.8	0.431	438	12	0.01
47	0	1	0	1	1	3	8	0	2	124	0.5	0.01	9	6.2	42.4	0.9	1.71533	0.79	6.4	70	278	1.41	4.08	0.55	1.35	2.54	0.33	96.144	38.78	0.56028	66	14.5	0.01
48	0	0	0	1	1	3	3	0	4	133	5.2	0.067	54	10.8	27.1	1.94	2.45117	3.88	6.5	75	349	1.13	7.32	1.09	1.39	5.34	0.189	87.607	68.34	7.82163	2133	22.8	0.019
49	0	1	0	0	1	2	20	0.1	4	98	0.03	0.064	59	6.77	28.8	2.92	1.53148	2.63	8.5	121	448	1.6	4.42	1.6	4.27	2.42	0.966	59.777	57.43	0.106	72	7	0.01
50	1	1	0	1	0	2	0.5	8	4	99	1.3	0.17	35	7.2	35	5.93	2.23213	2.99	4.7	117	298	1.47	4.66	2.03	1.36	2.9	0.291	46.62	29.03	1.014	80	10.8	0.01
51	1	1	1	0	1	3	20	10	3	124	0.3	0.074	17	9.1	30.1	2.35	2.24753	3.68	10.3	110	317	1.94	4.54	1.15	1.76	2.68	0.387	56.671	33.9	14.647	23	10.8	0.039
52	1	1	0	0	0	2	10	0.5	4	99	0.7	0.22	105	5.64	25.8	14.8	3.04689	14.2	13.69	264	318	3.22	7.48	15.45	0.6	1.26	0.08	17.67	79.19	35	29	13.6	0.111
53	0	1	0	1	1	1	2	1	1	165	1.06	0.51	0.4	8.54	48.3	0.68	1.24279	0.24	4.8	66	324	0.76	4.25	4.9	1.07	2.54	0.251	87.607	55.87	0.1365	48	26	0.012
54	1	1	1	1	1	3	18	1	5	84	0.1	0.07	108	6.7	26.3	6	2.87755	17.56	16.93	384	442	2.36	6.47	1.58	1.09	4.06	0.164	17.67	25.83	11.3343	166	11	0.01
55	1	1	1	1	1	3	13	10	5	96	0.5	0.175	37	10.24	38.2	1.49	1.63165	8.33	26.1	447	631	4.18	4.67	2.19	1.01	2.9	0.216	11.08	288	0.7263	102	8	0.5
56	0	1	1	0	0	2	1	0.5	4	128	2.2	0.14	87	6.2	35.6	5.85	2.81289	8.44	11.9	122	340	1.68	6.32	2.42	1.47	4.27	0.232	46.855	23.14	0.2274	209	40.3	0.032
57	0	1	0	0	0	2	10	2	4	120	3.87	0.04	24	8.49	36.3	2.29	1.78888	0.81	7.4	56	195	0.88	6.59	0.89	2.15	3.65	0.326	88.152	107.9	0.106	472	42	0.021
58	1	1	0	1	1	2	15	18	5	90	0.03	0.69	29	5.5	29.7	8.09	2.84776	12.14	25.1	384	417	4.34	3.09	0.82	0.98	1.77	0.317	14.286	97.16	11.895	129	5	0.14
59	1	1	0	1	0	3	2	2	4	93	0.6	0.07	13	5.9	17.2	10.44	2.46706	3.59	7.27	118	247	2.83	7.48	2.25	0.92	7.3	0.076	48.08	32.6	2.74	415	42	0.01
60	1	0	1	1	0	2	16	1	4	116	0.03	0.04	59	7.3	45.7	1.23	1.56561	0.61	11.69	167	358	2.18	5.31	2.41	1.3	3.18	0.244	29.464	38.6	14.647	52	25	0.02
61	0	1	1	1	1	2	10	0.2	4	110	0	0.2	80	7.1	35.1	4.4	2.48413	4.18	7.2	125	512	1.47	7.32	8.96	0.95	3.44	0.129	61.223	50.6	0.293	149	15	0.01
62	1	1	0	0	1	2	11	1.5	4	84	0.1	0.23	79	4.9	30.2	17.84	2.67541	7.18	12.6	187	459	2.09	6.79	2.16	1.1	5.16	0.162	35.315	68.34	0.61	92	12.5	0.01
63	1	0	1	1	0	2	7	0.1	5	93	1.17	0.241	54	10.57	25.7	8.58	1.3296	3.14	12.72	260	467	3.08	7.95	4.36	1.01	5.58	0.127	34.77	57.59	30.215	575	49	0.019
64	0	1	0	0	1	2	15	7	5	139	0.5	0.04	16	8.94	34.8	7.32	2.09454	1.88	9.07	111	435	1.4	5.58	4.67	0.8	3.31	0.143	48.308	28.2	0.1693	77	11	0.01
65	1	0	0	1	1	3	16	0.3	2	142	2.28	0.04	12	7.4	40.4	1.86	1.42193	0.19	5.01	85	294	0.96	5.65	3.12	0.77	3.9	0.136	82.45	13.6	0.6771	188	13.6	0.01
66	1	0	0	0	1	3	26	4	3	100	0.86	0.04	20	5.38	39.4	1.49	0.389166	171.63	15.5	290	531	2.07	3.12	2.07	0.68	1.89	0.217	17.67	111.5	9.134	50	21.4	0.01
67	0	0	1	1	0	2	10	20	2	127	0.6	0.04	16	8.9	46.1	0.64	1.80936	1.12	8.1	73	199	1.47	2.7	15.45	0.78	2.09	0.08	102.581	5.47	14.647	81	14	0.015
68	0	1	0	0	1	3	15	6	2	94	1.5	0.48	20	5.7	38.1	1	1.58127	0.95	9.1	143	386	1.78	3.89	0.7	1.85	2.04	0.475	43.96	39.52	0.106	24	11.4	0.01
69	1	0	0	1	0	3	10	10	3	98	2.3	0.1	50	6.9	47.7	0.44	1.37585	0.41	10.2	127	375	1.83	5.47	1.01	1.69	2.86	0.308	38.784	88.14	0.1482	52	19.1	0.01
70	1	1	0	0	0	2	10	0.5	4	118	0.78	0.073	6.7	6.26	27	3.09	2.66173	2.13	9.64	109	503	1.73	11	1.3	3.39	6.74	0.308	47.093	44.07	0.9179	26	12	0.057
71	0	1	1	1	1	2	15	3	4	137	4.93	0.1	16	8.7	40.7	6.92	2.40574	2.87	5.9	174	494	1.14	5.98	4.09	1.15	3.73	0.192	38.26	291.1	0.135	235	15.1	0.02
72	0	0	0	1	1	2	1	0	4	109	46.35	0.844	67	7.4	27.8	2.29	2.26527	3.02	8.2	92	326	1.35	4.58	1.5	0.9	3.37	0.196	88.066	125.8	5.253	102	7	0.01
73	1	1	0	0	0	2	7	18	4	97	1.5	0.04	53	11.9	35.3	2.46	2.4891	3.43	6.5	74	277	1.23	5.79	1.15	3.06	2.7	0.528	82.8	68.23	1.47634	233	20.3	0.01
74	0	1	0	0	1	2	6	2	4	113	0.5	0.04	41	8.2	17.3	9.53	2.29268	2.96	7.9	144	337	1.55	12.69	2.35	0.91	11.54	0.071	47.093	63.64	0.1365	589	28	0.063
75	1	1	0	1	0	3	20	1	4	85	7.23	0.51	116	7.8	25.2	3.424	1.38686	10.87	32.2	662	414	4.32	5.21	1.23	1.32	3.42	0.253	5.23	153.9	17.063	60	14.8	0.05
76	1	1	0	1	0	2	6	2	4	99	0.86	0.02	96	7.41	20.5	8.42	2.90907	15.16	5.36	65	197	0.99	6.22	1.35	1.74	4.37	0.279	86.99	22.81	2.911	400	26.8	0.042
77	0	1	0	0	1	2	23	18	2	101	3.28	0.11	9.5	6.47	41.2	0.15	0.346353	0.07	7.3	143	334	1.45	2.99	0.82	0.96	1.84	0.321	48.85	44.1	0.182	48	15	0.037
78	1	0	1	0	1	1	0.5	0	4	105	2.89	0.13	59	11.65	27	2.74	1.56561	0.74	11.85	165	360	3.61	5.42	1.06	1.12	3.51	0.206	36.179	38.6	0.1975	112	41.4	0.022
79	0	1	0	0	0	2	2	2	4	121	0.1	0.08	21	12.7	33.5	2.35	2.01233	1.29	7.1	50	263	1.16	8.35	3.08	1.1	6.54	0.131	54.615	22.81	0.06	52	14	0.01
80	0	0	0	1	1	3	10	22	3	137	2.7	0.11	24	8.4	37.4	0.39	1.13988	0.22	9.7	125	348	1.88	5.69	2.52	1.09	4.07	0.191	52.089	43.3	0.2466	72	10	0.01
81	1	1	1	0	1	2	10	2	4	80	1.3	0.17	21	7.1	34.9	1.81	2.38391	2.51	21.65	351	331	3.48	3.15	0.78	1.07	1.74	0.339	14.286	42.71	4.614	157	14.2	0.124
82	0	0	1	0	1	1	6	0.5	4	131	0.1	0.04	6	7.9	41.2	1.4	1.68341	0.64	6.1	59	381	1.04	4.13	3.83	0.86	2.2	0.208	122.94	23.9	0.063	52	12	0.01
83	0	1	0	0	1	1	7	1	4	96	1.5	0.2	59	5.86	33.3	3.22	2.56407	3.43	8.87	110	366	1.8	3.82	1.38	1.16	2.25	0.303	56.52	40.08	0.4537	94	18.5	0.124
84	1	1	1	1	1	2	3	4	5	93	0.84	0.053	21	5.12	28.9	5.3	2.62291	6.2	14.69	322	438	2.4	5.52	5.04	1.09	2.33	0.197	22.48	112.3	0.7263	86	16.6	0.04
85	1	1	1	1	1	3	20	2	4	111	3	0.04	44	11.2	25.3	11.62	1.73799	2.27	12.7	126	369	1.61	6.37	2.81	0.56	5.18	0.087	49.809	64.8	14.647	36	27	0.111
86	0	0	1	0	0	2	7	1	4	108	0.2	0.04	79	7.4	31.8	8.38	2.74322	6.5	12.4	102	402	1.42	9.32	2.37	1.95	6.67	0.209	54.615	63.64	33.352	26	19.1	0.01
87	1	0	0	0	1	2	0.5	28	4	97	0.43	0.27	0.28	7.8	29.8	6.46	2.5114	3.83	15.91	482	595	4.32	4.83	2.37	0.62	3.38	0.128	10.93	141.1	34.011	205	8.7	0.041
88	1	0	1	1	0	2	10	2	5	92	2.2	0.07	18	8.6	23.8	8.01	2.96249	17.56	20.02	387	303	4.29	5.43	1.12	1.93	3.21	0.355	11.05	212.9	35	229	41.4	0.096
89	1	0	0	0	1	3	6	30	1	147	2.7	0.22	6	7.58	44.1	0.61	1.63165	0.52	5.1	87	178	1.49	5.96	1.29	1.39	4.15	0.233	83.03	30.82	1.09309	295.4	15	0.05
90	0	1	0	1	0	2	5	0	4	111	14.2	0.04	10	9.8	28.8	2.3	2.28151	2.68	9.1	65	285	2.02	3.6	1.27	0.64	2.59	0.177	90.916	40.04	14.837	2111	26.4	0.19
91	1	1	0	1	1	2	10	0	4	128	0.1	0.04	41	9.79	21.6	10.3	2.67541	4.21	5.87	151	290	1.53	6.21	1.25	0.96	4.77	0.154	53.586	39.22	0.61	290	35.6	0.038
92	0	0	1	0	1	2	10	0	3	114	0.5	0.04	33	5.6	41.2	4.6	2.34555	3.94	10.2	113	456	1.4	4.92	1.47	1.52	3.24	0.308	57.73	38.78	2.56982	52	16	0.015
93	0	1	0	0	1	1	0.5	0	2	156	13.31	0.074	8.6	10.8	48.4	0.98	1.73215	0.75	2.1	68	366	1.08	7.06	6.27	1.12	5.1	0.158	115.412	67.9	3.70114	103	15.2	0.034
94	1	1	0	0	0	2	4	3	4	95	1.2	0.21	48	8.2	42.8	3.55	2.37834	3.9	8.3	114	254	1.5	6.4	1.41	1.83	4.26	0.285	45.452	76.4	0.106	72	27.9	0.012
95	1	1	1	0	0	3	15	5	4	116	0	0.19	21	5.57	42.8	2.5	2.21524	2.39	11.43	247	353	2.4	5.23	1.34	1.57	3.25	0.3	61.34	117.8	9.134	94	19.8	0.12
96	0	1	0	1	0	2	20	0.1	4	83	3.4	0.12	130	8.4	20.2	10.24	2.90909	13.28	4.4	111	233	1.47	6.15	2.43	0.95	4.26	0.099	46.942	22.81	7.453	459	14.6	0.063
97	0	1	1	1	1	2	20	1	4	108	0.5	0.2	14	6.2	35.9	4.61	2.72682	6.2	5.7	50	311	1.19	4.33	0.36	2.1	2.19	0.484	112.75	31.86	0.2396	117	14.5	0.01
98	1	1	1	0	0	2	13	0	5	111	1.86	0.2	111	4.4	24	24.62	3.20797	23.75	20.73	312	203	3.59	8.79	2.79	1.09	7.12	0.124	30.55	161.7	19.481	746	58.5	0.097
99	1	1	0	1	1	3	9	14	5	97	1.3	0.122	32	5.7	35.5	8.33	2.58255	5.51	12.4	168	557	2.03	3.75	2.12	0.94	2.18	0.25	36.179	59.3	4.581	72	13.4	0.01
100	1	0	1	0	0	2	2	4	4	68	0.97	0.12	59	6.2	18.6	7.67	2.5121	4.32	9.19	141	256	1.59	4.59	1.14	1.73	2.87	0.44	38.784	88.14	14.837	233	20.4	0.019
101	1	1	1	0	0	2	9	0.6	2	87	0.89	0.023	83	11.68	37.8	0.67	1.15806	0.81	8.3	120	274	1.39	4.68	1.12	1.55	2.78	0.331	55.73	55.36	0.03822	52	12	0.01
102	0	1	1	1	0	2	8	8	2	127	2	0.04	46	10.1	39.8	2.81	2.22727	2.28	9.4	126	255	2.21	6.98	4.81	0.89	4.82	0.127	55.734	26.85	0.6271	264	26.4	0.01
103	0	1	1	1	1	2	21	10	3	153	10.7	0.04	21	6.5	32.5	7.5	2.59381	5.47	3.3	81	246	1.04	4.38	0.93	1.18	2.87	0.269	93.102	21.14	0.2396	870	72	0.021
104	1	1	0	0	1	2	7	4	4	103	0	0.13	25	5.2	44.4	2.48	1.92174	1.27	14.9	475	364	3.48	3.41	1.01	1.15	1.99	0.337	11.125	136.6	3.762	80	1.2	0.01
105	1	0	1	0	0	3	10	2	3	97	0.5	0.04	39	6.1	41.9	1.46	1.97257	2.02	10.6	139	336	1.77	3.18	1.26	1.45	1.41	0.455	35.018	67.9	0.097	81	10	0.015
106	0	1	1	1	0	2	11	2	4	120	1.95	0.053	31	7.55	30.4	3.4	2.58898	3.02	7.2	113	342	1.03	3.19	1.03	1.04	1.77	0.326	49.629	57.59	0.431	48	10	0.01
107	0	0	1	0	0	2	2	2	4	150	0.84	0.04	20	12.4	33.1	2.3	2.37771	3.88	7.34	73	346	1.12	4.99	1.26	1.56	3.23	0.312	86.568	55.87	0.13578	72	34	0.01
108	0	1	1	1	1	2	16	3	3	90	0.5	0.122	13	8.6	47.8	0.09	0.311754	0.51	17.53	206	634	2.23	4.26	1.93	1.28	2.22	0.3	30.76	72.93	11.343	52	14.9	0.01
109	0	1	0	0	1	3	7	8	1	156	1.7	0.044	5.8	9.5	41.4	0.75	2.3887	4.18	9.34	171	413	1.68	3.88	2.87	0.78	2.09	0.201	46.33	23.9	0.063	136	8.6	0.01
110	1	1	1	1	0	3	3	3	5	73	7.1	0.04	51	10.4	25.9	3.28	2.47799	3.59	27	165	470	2.58	4.45	1	2.31	2.09	0.519	27.67	68.7	25	166	5.21	0.01
111	1	1	0	1	0	2	12	0	5	80	37.94	0.04	96	7.02	27.2	1.54	1.97257	1.27	23.89	241	509	3.56	4.89	1.45	1.47	2.91	0.3	5.23	158.1	33.067	394	20.4	0.095
112	1	1	1	1	1	2	8	0.3	2	134	3.8	0.28	33	6	35.4	14.52	2.73957	8.27	13.3	264	453	3.61	4.21	3.5	0.92	2.35	0.218	21	70.75	1.198	220	1.2	0.041
113	1	0	1	0	1	2	10	0.5	5	143	26.6	0.04	61	7.54	37.9	13.96	2.46046	6.17	5.9	152	403	1.95	4.31	2.37	1.04	2.32	0.241	46.99	51.31	1.004	175	11.1	0.01
114	0	1	0	0	1	1	4	4	1	153	4.82	0.04	20	8.4	48.7	1.03	1.42193	0.34	4.9	69	302	1.13	5.05	3.77	0.73	2.78	0.144	106.709	38.46	0.063	48	12	0.01
115	0	1	1	1	1	2	3	0.5	4	106	0	0.093	17	5.6	37.1	2.43	2.02869	1.91	11.3	146	529	1.39	4.82	1.28	1.02	3.57	0.211	48.308	40.67	2.197	295.4	20.4	0.01
116	1	1	0	1	1	2	9	4	4	62	4.15	0.139	72	6.11	30.7	11.29	2.76952	8.77	38.21	841	528	2.66	4.57	3.33	0.66	2.53	0.144	5.812	97.72	13.776	100	20.1	0.5
117	0	1	0	0	0	2	8	3	4	99	0.1	0.094	53	6.26	28.3	5.04	2.23213	2.68	10.81	124	268	1.39	5.12	1.45	2.25	2.52	0.439	42.53	233.2	0.06	229	12.8	0.012
118	0	1	1	1	1	2	2	0	4	128	0.8	0.04	34	9.5	38.1	1.25	1.77393	3.96	8.4	63	218	1.61	5.2	1.22	1.65	3.22	0.317	56.671	42.71	0.56028	50	11	0.038
119	1	0	0	1	1	2	14	2	4	131	29.73	0.04	50	5.86	24.6	5.56	2.66164	7.21	8.45	145	211	1.57	7.19	1.21	1.26	5.71	0.175	36.47	32.56	3.123	135	27	0.013
120	0	1	0	0	1	1	16	2	4	121	2.26	0.089	34	7.5	20.9	5.27	2.52382	4.09	5.02	84	312	1.11	4.72	0.64	1.37	3.13	0.29	82.45	30.17	0.1975	342	26.1	0.017
121	0	1	0	1	1	2	10	2	4	100	1.08	0.02	114	5.6	21.7	14.02	2.90909	12.89	5.6	118	311	1.46	6.63	2.99	1.41	4.26	0.212	62.491	62.12	0.083	144	15	0.026
122	0	1	1	1	1	2	6	22	4	113	4.6	0.1	43	6.7	39	1.21	1.37585	0.57	4.9	73	361	0.82	5.18	2.28	0.79	3.95	0.152	90.995	27.84	1.004	91	14.9	0.01
123	1	1	0	1	1	2	2	0	4	89	0.1	0.2	30	4.67	47.9	7.06	2.46046	4.01	10.47	108	395	0.89	4.46	0.96	0.82	3.05	0.183	49.629	59.3	0.2466	64	26	0.012
124	0	1	0	0	0	1	3	0	4	133	1.78	0.065	12	7.3	40.9	0.41	1.20602	0.3	6.8	63	187	0.88	7.74	1.86	3.12	4.09	0.403	115.412	25.03	1.15111	103	40.3	0.01
125	0	1	0	0	1	2	8	10	4	134	1.5	0.11	57	7.6	34.7	3.08	2.77477	1.82	10.3	129	362	2.18	6.91	1.37	0.91	5.46	0.131	57.73	30.07	0.06	52	15.4	0.01
126	0	1	0	1	0	2	5	0.5	4	79	0.1	0.2	78	8.5	24	7.93	2.6081	7.57	5.2	66	357	0.8	9.98	2.17	1.68	7.09	0.168	95.75	34.09	1.09309	280	38	0.02
127	0	1	1	0	0	2	4	1	3	87	129.4	0.23	74	10.5	42	3.77	2.62987	4.28	4.2	69	262	0.82	3.49	1.59	0.85	2.4	0.243	86.99	39.52	0.05281	36	14	0.022
128	0	1	0	0	1	2	20	22	3	148	0.5	0.04	36	8.4	42	7.52	2.24348	1.82	6.97	90	404	1.4	7.35	2.98	1.6	4.72	0.217	79.7	22.11	0.8824	144	15	0.007
129	1	1	1	1	0	2	10	1	4	86	0.78	0.2	31	5.74	42.7	0.87	1.37585	0.39	16.49	140	380	1.78	3.7	0.4	1.25	1.95	0.337	36.707	71.64	0.384	93	6	0.01
130	0	1	0	0	1	2	5	1	4	141	0.7	0.04	7	8.4	43.4	2.56	2.33672	2.64	7.6	112	522	1.19	3.71	0.81	1.3	2.08	0.35	61.223	67.6	0.2396	74	11.1	0.01
131	1	1	0	0	0	2	14	20	3	118	1.11	0.698	21	8.04	38	4.17	2.52556	4.26	14.5	201	330	2.33	6.47	2.91	0.91	4.18	0.198	22.63	67.6	5.043	83	25.8	0.086
132	1	1	0	1	1	2	5	10	2	142	4.01	0.09	23	10.82	30.7	5.31	2.70871	7.21	9.7	138	454	1.62	5.7	2.15	1.15	2.89	0.126	57.73	20.04	7.453	290	21.4	0.01
133	1	1	0	0	1	3	10	10	4	119	0.217	0.094	17	8.3	37.7	3.1	2.01119	2.27	13.1	166	480	1.78	4.41	1.86	0.84	2.96	0.19	36.707	27.93	0.293	89	9	0.01
134	1	1	0	0	1	2	3	3	5	89	0.1	0.17	22	6.11	37.9	1.29	1.43345	0.4	37.88	597	431	4.2	2.78	1.28	0.86	1.54	0.309	8.62	180.6	10.1564	52	11	0.022
135	1	0	1	1	1	2	10	0.5	4	109	0.2	0.04	27	8.8	24.3	4.504	2.62948	5.92	6.9	115	269	1.43	5.37	0.46	2	3.26	0.372	62.68	19.5	1.014	137	14.6	0.043
136	0	1	0	1	1	3	8	0	3	113	0.75	0.04	6.1	6.22	36.7	0.97	1.53148	1.97	13.38	154	407	1.22	4.32	2.02	1.22	2.68	0.282	35.018	59.2	0.1482	93	9.2	0.01
137	1	1	0	0	1	2	18	18	5	113	0.64	0.1	17	5.2	33.8	0.93	1.92174	1.78	18.9	235	461	2.29	4.08	2.01	0.91	2.83	0.223	35.4	67.1	33.067	281	22.8	0.012
138	0	1	1	0	1	1	0.5	0.5	4	90	12.2	0.13	108	11.8	22.9	7.53	2.91675	12.25	13.1	109	461	1.25	5.7	2.97	1.16	3.31	0.203	77.506	68.94	3.70114	173	8	0.02
139	0	1	0	0	1	2	8	0.7	4	138	3.3	0.13	61	7.41	36.6	1.82	1.45758	0.39	10.87	89	307	1.37	4.66	1.36	1	3.14	0.214	96.62	55.87	20.7788	81	22	0.01
140	0	1	1	0	0	2	5	1	4	100	1.7	0.04	50	6.69	30.7	4.186	2.64473	5.08	7	53	347	1.85	4.88	1.75	1.09	2.99	0.223	91.675	37.04	0.763	205	15	0.01
141	0	1	0	0	0	3	2	17	4	107	0.701	0.04	30	6.8	34.2	3.38	2.33306	3.72	10.4	93	283	0.9	6.1	1.22	1.27	4.33	0.208	60.283	62.12	0.46346	91	19.1	0.021
142	0	1	0	0	0	3	14	7	4	131	0.5	0.04	34	9.6	36	4.06	2.70092	5.68	4.8	62	268	0.96	6.19	1.36	1.68	4.38	0.271	114.95	45.56	0.56028	72	34	0.012
143	1	1	1	1	1	2	8	4	5	76	2	0.27	68	7.2	31.6	7.73	2.64308	6.57	32	827	532	3.64	5.05	1.57	1.13	3.51	0.223	5.812	97.72	34.6237	281	11	0.622
144	0	1	0	1	0	2	4	0.5	4	96	3.28	0.2	27	4.87	30.1	5.93	2.60235	4.8	7.33	77	385	1.78	4.59	1.73	1.28	2.95	0.278	79.47	35.1	2.56982	155	11.4	0.045
145	1	0	1	0	1	3	10	10	5	101	3.9	0.175	16	6.36	42	2.23	2.0306	5.09	29.42	452	537	1.12	2.7	2.35	0.68	1.16	0.251	10.93	115.5	3.588	166	17	0.039
146	1	0	1	0	1	2	20	10	2	149	7.7	0.19	39	11.1	30.9	9.66	2.91043	13.25	5.6	121	321	1.66	6.89	2.91	1.24	4.78	0.179	58.53	133.9	3.70114	219	34	0.012
147	1	1	0	0	1	2	5	3	5	106	7.49	0.12	85	7.63	39.4	2.44	2.62987	2.82	21.98	410	472	4.2	5.02	1.61	0.81	4.04	0.161	21.11	121.1	0.6271	166	14.8	0.01
148	0	1	0	1	0	1	0.5	0.5	4	116	0.02	0.053	59	6	23.6	10.4	2.58898	11.4	6.79	115	264	1.24	9.25	6.49	1.3	5.39	0.14	53.609	14.49	1.81892	209	16.5	0.01
149	1	0	0	1	1	2	13	0.3	4	105	0.95	0.05	97	5.23	18	8.54	0.454845	4.98	8.1	119	433	1.94	6.7	1.6	1.83	4.64	0.273	47.362	63.22	0.1365	91	14.8	0.02
150	0	1	1	1	0	2	0.5	8	4	12.7	0.04	5.65	24	9.23	23.1	8.34	2.79432	9.26	14.8	73	227	3.56	7.3	2.27	1.42	4.79	0.194	74.529	158.5	1.987	59	15.2	0.04
151	0	1	0	1	1	2	4	0	2	143	0.918	0.15	6.8	9.13	44.7	0.38	1.3296	0.24	7.3	100	272	1.62	3.8	1.41	0.99	2.74	0.26	74.529	54.25	0.0385	78	11	0.01
152	1	0	1	0	1	3	3	0	4	101	31.2	0.2	21	9.32	45.3	7.87	2.64308	8.34	18.7	179	529	2.07	3.68	0.91	1.28	2.06	0.347	46.663	21.14	0.05167	48	21.4	0.01
153	1	1	0	0	1	2	10	0.1	4	89	17.91	0.089	114	5.13	20.9	5.004	2.65208	7.09	8.24	126	305	2.25	7.04	1.91	0.92	5.61	0.13	56.52	63.22	1.43	386	10	0.022
154	0	0	0	1	1	2	0.5	7	4	145	0.8	0.07	13	10.7	28.7	6.38	2.63268	5.04	6.1	102	314	1.26	5.53	5.92	1.06	3.04	0.191	74.529	30.7	1.81892	153	26.8	0.01
155	0	1	0	1	0	3	6	0.5	4	109	2.31	0.05	14	8.4	28.9	4.9	2.76597	6.43	11.7	109	311	2.08	6.7	2.28	1.1	4.38	0.164	67.416	106.9	13.506	64	25.8	0.111
156	0	1	0	0	0	1	7	0	4	125	3.2	0.139	40	10.3	33	8.4	2.45947	4.05	5.22	79	278	1.01	5.67	2.1	1.09	3.84	0.192	82.882	28.2	14.837	377	19.8	0.01
157	1	1	0	1	1	2	10	2	4	101	2.4	0.22	19	7.4	20.9	7.26	2.3887	4.98	10.7	131	371	2.83	6.43	1.3	1.67	4.11	0.259	52.8	29.03	0.42293	83	27.9	0.057
158	0	1	0	1	1	2	14	0	4	122	2.89	0.08	25	10.65	25	1.69	2.4891	1.27	11.3	87	187	1.23	6.96	0.57	2.94	3.8	0.422	63.911	5.47	14.647	112	17	0.038
159	1	1	1	0	0	2	10	8	5	70	13	0.04	123	6.5	30.4	8.65	2.59052	5.29	15.8	585	590	3.49	4.58	2.63	0.82	2.81	0.179	7.14	239.8	22.402	155	11.2	0.01
160	0	1	0	1	1	2	4	0.5	3	144	0.1	0.074	12	10.39	22	1.4	1.22968	1.01	7.37	92	327	1.4	5.38	2.55	0.74	3.14	0.191	88.066	55.87	0.0385	78	13.1	0.007
161	0	1	0	0	1	2	14	5	4	139	0.5	0.1	51	5.94	31.8	8.3	2.69654	7.51	9.2	119	273	1.42	5.54	2.13	1.17	3.83	0.211	64.068	108.2	0.182	72	25.8	0.012
162	1	1	1	0	1	2	7	2	4	94	1.06	0.04	92	7.4	41.9	4.11	2.4631	4.21	10.4	201	324	2.03	6.36	2.75	1	4.52	0.157	33.757	34.09	3.70114	290	15.2	0.01
163	1	1	1	0	0	2	3	3	4	87	1.03	0.2	26	6.4	28.5	10.48	2.31706	3.74	12.7	161	375	2.87	4.48	4.89	1.02	2.32	0.227	35.315	30.52	2.557	281	16.5	0.032
164	0	1	1	1	0	2	13	1	4	102	2.3	0.14	51	6.3	31.8	5.38	1.68341	6.58	6.8	89	382	1.61	6.37	1.46	1.54	4.46	0.241	92.35	62.12	0.106	1052	12.5	0.035
165	0	1	0	0	0	2	15	0	4	108	39.97	0.2	78	9.11	36.9	0.45	1.69557	0.59	3.83	71	350	1.04	7.08	2.02	0.71	5.38	0.1	31.44	23.9	0.1693	92	72	0.012
166	1	1	0	0	0	2	22	2	4	101	1.2	0.2	109	7.47	42.7	6.97	2.81536	13.76	10.68	160	337	2.28	6.47	2.38	1.41	4.47	0.217	29.464	51.13	4.581	281	14.6	0.022
167	0	1	1	1	1	2	15	4	5	84	5.93	0.2	71	5	23.3	7.88	2.65208	5	26.6	688.9	514	1.12	3.92	1.4	0.99	2.48	0.252	5.812	314.6	4.924	281	11	0.022
168	1	1	1	0	0	2	25	1	4	106	1.97	0.04	56	7.53	52.8	2.5	2.35463	2.36	8	179	399	2.4	4.9	3.87	0.7	2.1	0.142	55.5	38.46	11.343	135	15	0.01
169	1	1	0	0	0	1	7	0.5	5	79	0.68	0.23	71	5.2	29.1	4.58	2.72682	5.99	14.1	403	389	5.39	3.33	2.71	0.54	2.19	0.162	12.63	67.42	1.613	94	11.4	0.134
170	0	0	1	0	1	1	15	0	4	134	1.6	0.08	20	10.65	22.8	2.572	1.70122	4.91	9.04	125	310	1.41	5.12	0.82	2.24	2.82	0.437	68.03	44.9	0.1543	36	9.7	0.04
171	1	1	1	1	0	1	8	0	4	94	1.06	0.074	45	15.7	22	3.62	2.58427	6.58	7.3	87	197	1.6	7.37	2.47	1.36	5.55	0.184	46.62	319.9	22.402	144	26	0.01
172	0	1	0	0	1	2	0	0	4	125	1.36	0.1	11	5.1	31.3	7.48	2.76597	7.21	4.6	67	315	0.71	5.93	1.91	0.95	4.38	0.192	82.45	32.2	0.06	189	16.5	0.01
173	1	1	1	1	0	2	9	7	4	105	1.47	0.48	24	8.2	29.9	4.96	3.2531	3.94	10.97	116	391	1.81	3.37	1.04	1.65	1.52	0.489	49.801	58.1	20.7788	36	8	0.014
174	0	0	0	1	1	2	10	2	3	98	2	0.04	86	6.6	40.1	6.39	2.49543	3.77	10	139	295	2.25	3.9	2.78	0.83	2.17	0.212	53.848	388.6	0.653	69	9.2	0.041
175	0	0	1	0	1	2	12	0	2	133	1.2	0.032	24	7.47	38.7	2.46	1.56561	1.1	4.8	58	290	1.01	4.6	3.62	1.21	2.35	0.263	115.41	67.75	0.083	28	14	0.015
176	0	0	0	1	0	2	19	3	5	104	0.1	0.14	15	7.6	39.3	3.75	1.68341	0.59	7.7	114.8	386	1.43	4.79	1.33	1.17	3.35	0.244	34.77	30.45	0.182	66	28	0.012
177	1	0	0	0	0	2	0.5	0.5	5	86	1.4	0.2	46	5.5	27.5	6.34	2.05354	4.38	16.6	435	357	3.22	4.96	2.42	0.79	3.58	0.159	9.659	74.86	7.01	94	16.5	0.01
178	0	1	0	1	0	2	10	4	4	111	3.9	0.11	69	7.04	33.4	5.29	2.21833	2.29	10.84	106	339	1.5	6.52	2.21	1.18	4.39	0.18	79.47	28.44	0.258	94	10	0.013
179	0	1	1	0	0	2	9	4	4	115	6.77	0.047	39	6	27.4	8.55	2.24286	4.73	5.91	65	280	1.04	6.93	1.04	1.76	4.94	0.253	96.85	32.2	33.352	263	12.8	0.108
180	1	1	0	1	0	2	4	4	5	100	0.6	0.04	73	6.13	27	5.228	2.70044	8.18	13.4	273	339	2.58	6.2	1.61	1.55	4.27	0.25	16.15	88.9	11.3343	160	25	0.01
181	0	1	1	1	1	2	2	0.5	4	109	15.45	0.053	74	10.1	23.4	7.2	2.91169	11.06	4.94	83	359	1.26	4.95	1.4	0.94	3.34	0.189	101.149	30.82	12.308	144	12	0.02
182	1	1	0	0	1	1	0.5	0	4	102	23.74	0.09	115	9.78	22.4	1.25	2.67156	4.91	8.65	205	413	2.23	8.61	2.41	2.65	5.43	0.307	52.8	23.14	0.298	52	11	0.831
183	0	1	0	0	1	2	8	0	4	103	0.84	0.048	54	10.1	28.1	5.11	2.56828	3.88	5.5	69	230	0.82	8.97	1.44	2.54	5.47	0.283	106.709	64.4	1.15111	126	19.8	0.01
184	0	0	0	1	1	2	13	0.2	4	114	0.5	0.04	15	8.4	39.6	7.52	2.42372	4.13	7.1	120	312	1.5	7.56	4.95	0.95	5.28	0.125	43.629	15.96	0.13578	126	15	0.01
185	0	1	0	0	1	2	3	0	1	182	0.1	0.04	1	6.3	49.4	1	1.84485	0.73	8.9	105	521	1.37	6.48	14.75	0.82	1.33	0.126	73.495	13.6	0.063	40	7	0.01
186	1	0	0	0	1	2	1	0.5	5	91	0.1	0.139	31	6	31.8	3.91	2.47056	5	20.42	755	376	7.11	3.95	1.12	1.13	2.57	0.286	6.86	139.4	10.1564	126	11.4	0.01
187	1	1	0	0	0	3	9	1	4	57	0.61	0.07	130	4.6	25.7	2.44	2.73222	2.39	6.4	142.3	247	1.94	4.05	3.83	0.92	2.59	0.19	22.64	88.14	0.431	60	11	0.01
188	0	1	0	0	1	2	7	0.5	4	95	1.4	0.2	104	10.6	22.9	10.71	3.02748	15.74	7.7	112	275	2.28	6.82	1.73	1.52	5.06	0.222	38.784	67.13	2.911	65	58.5	0.01
189	1	1	1	1	1	2	9	0.5	4	102	0.1	0.053	41	7.19	19.6	8.9	2.81502	10.5	6.8	150	196	1.59	6.32	1.79	1.42	4.18	0.224	58.43	42.71	0.61	295.4	26.1	0.01
190	1	1	0	0	1	2	10	0	5	68	13.14	0.063	122	10.12	29.4	6.16	1.38686	4.95	42.3	758	867	4.79	4.86	1.08	1.12	3.4	0.23	6.64	288.9	35	459	15	0.032
191	0	0	0	1	1	2	6	6	5	125	2.37	0.14	15	4.91	38.7	9	1.53148	5.32	10.59	130	380	1.61	2.83	0.91	0.94	1.34	0.332	59.351	32.37	1.123	75	14	0.01
192	1	1	0	0	1	2	12	3	5	123	0.8	0.04	35	7.8	29.2	3.143	2.73957	7.9	8.32	229	412	2.8	5.13	3.98	0.81	3	0.157	25.95	87.33	35	91	9	0.412
193	1	1	0	0	1	2	2	2	3	117	0.1	0.2	12	7.1	35.1	7.78	2.5121	3.55	24	357	565	2.61	5.56	5.24	0.95	3.02	0.17	16.621	50.95	35	36	1.2	0.622
194	0	1	0	1	1	2	7	0.5	2	129	0	0.08	23	9	45.2	0.7	1.34163	0.57	6.8	121	252	1.4	5.85	3.48	1.15	3.46	0.196	59.777	28.46	0.005	183	42	0.01
195	1	1	0	0	1	1	1	0	4	99	1.84	0.04	68	8.88	31.7	19.02	3.03787	12.89	12.44	444	275	3.48	3.86	1.32	1.06	2.87	0.288	11.08	71.86	11.895	126	11	0.01
196	1	0	0	1	1	3	14	5	4	101	1.11	0.2	72	5.57	29.8	0.39	0.625312	8.98	10.16	157	557	2.09	5.06	2.28	1.66	3.35	0.328	60.01	53.67	0.258	69	9	0.01
197	0	0	1	1	1	2	13	0	4	95	3.8	0.48	74	8	19.4	6.63	2.67388	5.93	12.8	123	377	1.61	5.57	0.99	1.6	3.73	0.287	61.99	40.63	0.4982	3446	72	0.118
198	1	1	0	1	0	2	6	0.5	4	113	0.84	0.2	85	9.27	47.2	5.2	2.67115	5.94	8.26	84	233	1.4	6.8	4.75	1.33	4.2	0.195	42.42	51.13	5.253	198	19.8	0.034
199	0	1	0	0	1	2	6	2	4	128	1.2	0.05	36	10.1	26.8	1.36	2.55943	9.12	9.5	105	358	1.26	6.32	1.43	1.35	4.5	0.213	72.12	64.4	1.919	102	22	0.01
200	0	1	0	1	0	2	10	0	4	74	119.18	0.844	114	15.2	22.7	1.82	2.13027	1.29	2.6	38	153	0.88	4.64	1.82	0.76	3.02	0.163	56.52	13.6	0.6771	137	17	0.01
201	1	1	0	0	0	2	0.5	0	4	92	34.88	0.1	112	9.24	27.5	4.5	2.29268	7.57	9.6	80	156	1.16	7.68	1.01	2.03	5.08	0.264	31.44	67.13	12.496	233	14.8	0.01
202	0	1	0	1	1	1	12	1	4	131	0.01	0.2	13	7	34.6	6.94	2.16164	3.14	8.1	118	208	2.23	4.57	0.87	1.81	2.3	0.396	68.03	9.9	0.2274	94	26	0.01
203	0	0	1	0	0	2	1	0.2	4	101	1.34	0.08	35	6.4	28.4	3.91	2.45143	4.03	6.2	69	323	1.08	4.9	1.32	1.21	3.42	0.246	87.607	23.14	0.31639	105	12	0.02
204	0	1	1	1	0	2	10	2	4	84	0.78	0.04	98	9.35	26	3.45	2.6081	4.95	12.36	91	312	1.4	5.4	1.29	1	3.1	0.185	101.149	68.94	0.1365	207	14	0.028
205	0	1	0	1	0	2	5	8	4	111	6.77	0.04	32	6.8	35.2	1.42	1.7926	0.68	9.5	71	350	1.37	5.69	1.59	1.11	4.25	0.195	68.03	17.7	2.911	40	72	0.007
206	1	1	0	0	1	3	0.5	6	4	117	1.05	0.2	59	13.06	29.6	4.26	2.24286	4.31	6.2	94	313	1.24	5.7	2.05	0.96	3.99	0.168	46.33	233.2	1.81892	1052	27	0.012
207	1	1	1	0	1	2	4	4	5	53	10.88	0.04	52	5.91	31.8	2.92	2.02869	4.38	25.8	674.9	554	2.8	3.05	1.11	1.02	2.55	0.305	16.4	19.25	35	51	42	0.096
208	1	0	0	1	1	2	3	0.5	5	113	0.6	0.08	77	5.4	35.6	9.72	2.69609	6.08	12.8	191	329	2.28	4.29	1.56	1.09	2.78	0.254	34.455	36.1	2.557	75	13.8	0.01
209	1	1	1	0	1	3	0	5	4	97	10.3	0.2	62	7.7	34.4	3.026	2.21833	2.82	17.72	314	403	3.32	6.08	2.56	1.08	4.27	0.177	16.4	40.21	7.01	29	15	0.038
210	0	0	0	1	1	2	2	2	4	102	0.7	0.02	38	5.9	27	7.86	2.64564	6.43	8.3	91	367	1.4	6.94	2.52	1.75	5.17	0.212	85.554	62.12	4.581	281	25.8	0.02
211	0	1	1	0	0	2	0	17	4	81	1.5	0.04	64	5.7	36	2.06	1.9848	1.34	9.6	102	336	1.25	3.88	1.31	1.48	2.96	0.381	56.97	30.17	1.47634	207	12	0.01
212	0	0	1	1	0	2	2	0.9	4	97	3.42	0.04	48	5.54	19	10.12	2.76952	10.02	11.9	125	285	2.13	10.8	1.8	0.96	8.41	0.088	51.81	51.13	7.453	290	67	0.01
213	0	1	0	0	1	3	2	0	4	111	1.2	0.064	28	6.8	24.7	2.88	2.97317	75.1	8.5	86	331	1.08	3.74	0.48	1.95	1.6	0.521	80.724	19.5	0.148	74	7	0.01
214	0	1	0	1	0	2	6	0.5	4	98	1.5	0.05	21	5.04	30.1	2.76	2.84649	9.12	4.5	45	298	1.23	4.34	1.88	1.1	2.89	0.253	112.75	23.9	0.56028	83	14.8	0.053
215	1	0	0	1	1	3	10	10	4	97	3.9	0.067	30	6.78	32	4.3	2.38391	4.26	32.1	424.4	408	4.2	3.72	1.11	0.89	2.65	0.239	22.48	23.7	0.9735	94	22.8	0.01
216	1	1	0	0	1	1	9	0.3	4	124	1.22	0.04	31	7.49	32.5	13.79	2.52382	1.82	8.7	151	307	1.95	7.52	2.69	1.11	6.36	0.147	47.093	21.1	0.1693	2955	67	0.118
217	0	0	0	1	1	3	20	15	4	91	0.81	0.053	16	7.4	35.6	3.59	2.60235	8.37	7.3	109	300	1.66	4.89	0.54	2.18	2.4	0.445	43.35	54.95	0.2396	448	14.5	0.042
218	1	0	0	1	1	1	1	0.3	4	114	10.1	0.2	81	7.59	37.9	4.59	2.24348	4.01	11.4	162	308	1.04	7.09	1.23	1.75	4.67	0.246	48.85	88.9	3.123	126	15.6	0.013
219	0	1	0	0	0	3	14	6	3	119	3.4	0.1	41	8.9	44.1	1.14	2.28151	1.89	9.1	109	330	1.62	4.89	3.17	0.89	2.72	0.182	46.33	27.93	14.647	64	9	0.041
220	1	0	1	0	1	3	10	7	4	104	0.5	0.2	56	7.52	35.1	7.37	2.73222	6.79	17.7	242	387	2.4	6.43	3.06	1.09	4.42	0.169	22.63	71.31	1.48336	415	18.6	0.041
221	1	1	1	0	1	2	3	4	5	98	1.28	0.08	17	5.62	22	4.23	2.67388	5	14.11	229	438	2.23	5.06	4.01	1.02	2.89	0.201	18.53	70.05	3.123	386	18.6	0.095
222	1	0	0	1	1	3	2	2	1	121	1.86	0.05	10	4.87	23.5	2.672	1.92174	1.73	11.43	225	305	2.16	5.57	0.64	2.48	2.6	0.445	16.05	60.15	28.963	439	22.8	0.02
223	1	1	0	0	1	3	8	40	4	80	1.8	0.5	53	6.7	29.3	5.6	2.53474	4.68	15	283	347	2.66	4.8	0.7	1.73	2.89	0.36	19.26	68.7	2.74	117	5.21	0.01
224	0	1	0	0	0	2	0.3	1	4	96	0.6	0.1	95	7.77	33.6	7.49	2.78418	7.49	11	91	397	1.46	6.19	2.52	1.43	4.05	0.231	64.48	68.23	12.308	100	16.6	0.01
225	0	0	0	1	1	1	0.3	0	1	182	1.4	0.08	8	7.6	49.7	0.61	0.983626	1.85	5.7	58	293	0.96	4.89	3.2	1.36	2.1	0.263	115.41	67.13	1.81892	40	16.5	0.01
226	0	1	1	1	0	2	4	0.7	4	100	1.78	0.1	65	6.1	34.3	1.86	1.38686	0.78	7.55	75	302	1.47	6.01	1.37	1.16	3.6	0.193	63.911	31.86	7.453	50	6	0.01
227	1	1	0	0	1	2	2	0	4	89	2.23	0.12	45	6	23.6	6.3	2.35501	3.1	9.79	256	264	1.66	4.32	0.7	1.21	2.87	0.286	22.48	42.79	1.689	448	12.5	0.01
228	1	1	0	1	1	2	12	2	4	122	1.34	0.2	6	6.8	37.3	3	2.24348	3.74	13.6	323	405	2.03	7.22	2.93	1.19	5.63	0.164	15.27	108.2	14.837	1130	30.1	0.01
229	0	1	1	0	0	2	20	0	4	96	0.1	0.02	20	10.65	37.5	5.52	2.93772	11.4	9	52	330	1.16	6.62	1.13	1.46	4.09	0.259	36.47	67.75	7.65964	342	20.1	0.038
230	1	1	0	0	0	2	12	0	4	93	1.14	0.48	26	6.6	31.4	3.75	1.79518	1.97	10	111	280	1.78	4.55	0.53	1.89	2.56	0.415	16.05	32.6	3.402	34	14.2	0.01
231	1	1	0	0	1	2	14	0	4	124	3.48	0.02	63	7.88	30.5	12.38	3.04689	13.37	9.31	105	226	1.85	3.1	1	1	2.09	0.322	70.84	67	0.431	81	14	0.01
232	1	1	0	1	0	2	10	2	4	84	4.63	0.142	51	6.8	29.6	11.96	2.46706	10.73	20.22	153	194	3.56	4.05	0.67	1.06	2.61	0.261	33.925	207.6	16.424	220	5.21	0.12
233	0	0	0	1	1	2	8	0	4	71	8.49	0.078	0.5	9.11	24.1	0.3	0.550228	0.16	4.8	54	199	1.14	3.57	1.29	0.47	2.17	0.131	108.48	38.46	10.1564	28	17.1	0.016
234	1	1	0	0	0	2	11	1	4	87	0.9	0.29	32	4.6	22.3	10.3	2.67156	7.33	12	162	292	0.8	7.44	2.11	2.01	4.9	0.27	46.855	80.5	0.083	59	16	0.012
235	1	1	1	1	0	2	1	2	5	49	3.6	0.17	53	7.7	29.4	10.48	2.67156	7.33	35.75	528	316	3.56	4.05	1.94	0.71	2.44	0.175	33.925	158.5	35	377	30.4	0.108
236	1	1	0	1	1	2	11	0.5	1	88	5.03	0.175	75	10.31	32.7	2.97	1.22968	3.72	18.16	610	432	4.32	4.59	1.9	0.75	3.3	0.163	6.86	140.5	3.762	60	17.9	0.01
237	1	1	0	0	1	2	7	2	4	92	0.92	0.07	24	6.84	31.9	7.35	2.36521	2.92	8.3	112	466	3.08	3.56	1.31	1.12	1.98	0.314	46.62	63.6	25	51	11	0.035
238	1	1	0	0	1	2	15	0.5	4	105	5.18	0.04	47	9.13	22.9	4.55	2.66164	7.13	5.2	98	281	1.18	6.94	1.08	1.19	5.74	0.171	103.304	47.17	0.06	2955	20.4	0.017
239	1	1	0	0	0	3	10	5	4	89	0.5	0.179	59	5.85	20.7	10.13	2.87089	13.76	14.69	154	298	3.17	7.26	4.17	1.09	5.02	0.15	28.07	87.6	1.424	126	27.9	0.053
240	0	0	1	1	1	3	19	0.8	4	96	20.848	0.04	26	8.83	25.4	5.83	2.70044	3.02	7.96	124	219	1.45	3.43	1.75	0.46	2.17	0.134	82.86	40.8	0.763	860	88	0.01
241	1	1	0	1	1	2	10	0.5	4	114	3.5	0.093	42	7.1	41.9	3.4	2.34034	2.13	11.6	118	368	1.47	5.39	1.31	1.3	3.63	0.241	58.252	13.6	0.42293	91	42	0.01
242	1	1	0	0	1	3	14	30	4	130	1.8	0.11	49	9.9	37.8	11.77	2.70092	4.68	7.35	120	494	1.5	9.31	4.58	1.09	6.67	0.117	55.5	30.36	0.135	112	12.5	0.01
243	0	0	0	1	1	1	2	0	2	164	4.5	0.2	52	11.2	49.3	0.4	1.81531	1.01	3.7	51	376	1.49	5.9	20.22	0.75	1.22	0.127	140.031	40.04	0.097	188	38	0.01
244	1	0	0	1	1	2	11	6	3	126	0.2	0.04	42	8	42.9	1	1.73997	0.75	7.8	88	338	1.5	5.14	1.43	2.17	2.8	0.422	31.44	18.47	0.13578	188	72	0.01
245	0	0	0	1	1	2	18	6	4	96	4.6	0.09	59	8.1	35.8	1.09	2.01233	2.37	7.9	98	447	1.19	6.5	1.89	1.19	4.77	0.183	72.916	26.85	0.06	74	11	0.01
246	1	1	1	0	0	2	15	0	5	94	1.34	0.08	51	7.33	29	2.85	2.90807	11.88	10.73	110	330	2.02	5.94	1.58	1.35	4.09	0.227	98.5	57.33	0.8743	137	19.1	0.013
247	0	0	0	1	0	2	0.5	0.5	4	105	1.1	0.05	35	8.9	35.2	1.49	2.52477	1.89	9.5	94	370	1.37	5.02	2.16	1.06	3.16	0.211	60.283	39.22	2.56982	93	7	0.01
248	1	0	1	0	1	1	1	2	4	105	7.93	0.13	22	7.4	27.3	3.55	2.33306	4.18	12.14	192	461	2.21	8.61	2.25	2.01	4.62	0.307	61.34	28.99	9.671	94	16.5	0.057
249	1	0	0	1	0	2	6	1	4	77	0.5	0.12	83	6.8	34.8	2.43	2.12349	3.1	20.2	186	262	2.8	6.07	1.26	1.11	4.5	0.182	26.602	51.6	9.134	89	16.5	0.01
250	0	1	0	0	1	2	10	10	4	101	0.64	0.08	19	6	40	2	2.08243	1.73	8.9	129	477	0.89	3.52	1.35	1.01	1.99	0.286	59.351	32.37	0.2274	94	11	0.035
251	1	1	1	0	1	2	0.5	0.8	4	80	3.45	0.08	169	9.17	22.6	8.38	2.56407	5.93	9.03	135	281	1.32	8.41	2.44	1.42	4.72	0.184	28.576	14.49	16.424	386	72	0.028
252	1	1	1	0	1	2	10	15	5	119	1.3	0.044	106	6.6	31.9	9.86	2.81502	10.13	17.36	278	375	3.17	5.95	2.86	1.26	3.82	0.211	21.11	82.99	0.2222	263	15.6	0.03
253	1	1	0	1	0	3	5	4	4	99	2.28	0.09	20	5.5	40.1	2.91	2.37834	4.99	13.2	213	338	1.59	6.14	3.9	0.94	3.86	0.153	35.77	76.4	0.1482	72	8.7	0.01
254	1	1	1	0	1	1	10	0	4	99	0.45	0.15	28	7.5	35.6	3.52	2.77477	8.37	11.52	152	351	1.73	6.05	1.02	1.57	4.28	0.259	49.809	23.95	1.014	105	26	0.012
255	0	1	0	0	1	1	8	2	1	125	9.77	0.094	16	6.3	40.1	0.2	0.389166	0.14	9.7	256	359	4.99	2.77	1.05	0.95	1.52	0.342	47.47	75.77	0.6271	81	8.6	0.022
256	0	0	0	1	1	2	18	4	4	109	4.98	0.14	61	6.7	26.7	10.82	2.60502	5.53	11.7	145	413	1.6	7.42	2.25	1.04	5.74	0.14	47.362	48.92	0.06	198	49	0.013
257	0	1	1	1	1	3	0.5	0	4	116	5.65	0.074	88	10.88	28.5	10.01	2.29268	2.96	7.6	74	162	1.36	7.99	2.79	1.73	4.32	0.216	96.144	23.14	9.959	60	25.8	0.007
258	0	1	0	1	1	2	14	0.5	4	96	1.1	0.21	72	5.8	20	8.75	2.58636	8.48	6.9	93	422	1.11	6.06	1.25	1.08	4.53	0.178	88.152	32.2	0.4537	173	72	0.012
259	0	1	0	1	1	2	17	14	3	136	6.7	0.093	14	7.1	40.7	2.7	2.13027	1.85	6.34	59	355	1.13	3.08	1.7	1.09	1.55	0.353	115.412	67.75	33.352	77	17	0.01
260	1	1	1	1	0	2	10	0.8	5	82	7	0.08	110	8.88	33.7	8.11	2.72682	7.33	28.77	599	562	4.6	5.54	3.3	0.84	3.08	0.151	5.812	228	0.9735	94	11.2	0.622
261	0	1	0	1	1	2	13	8	2	112	0.84	0.093	19	9.84	37.51	0.67	0.892095	0.81	11.1	114	361	1.18	4.43	0.93	1.47	2.43	0.331	67.01	64.4	6.27777	103	14.2	0.12
262	1	1	0	1	1	2	12	2	4	74	1.62	0.065	36	8.37	22.8	5.67	2.58255	5.29	12.8	169	324	2.07	3.33	1.25	0.96	1.92	0.288	61.34	80.5	0.293	83	13.8	0.01
263	0	1	0	0	1	2	2	1	4	126	1.3	0.04	23	5.5	36.4	3.24	2.12349	2.63	10.2	104.4	427	0.9	3.83	2.42	0.84	2.29	0.219	67.076	31.25	0.05281	82	7	0.012
264	0	1	0	1	0	3	0.5	3	4	87	0.72	0.03	10	4.88	39.8	2.43	2.16176	2.82	5.3	61	248	1.13	4.08	1.49	1.37	2.4	0.335	72.916	33.61	0.298	40	7	0.01
265	1	1	1	1	1	3	4	0	5	84	1.14	0.11	32	8.13	28.6	3.88	2.3887	3.36	12.25	299	446	3.61	3.97	0.84	1.02	1.98	0.256	18.53	64.8	0.7263	89	10	0.026
266	1	1	0	1	1	2	13	0	4	118	4.9	0.036	68	12	22.2	5.78	2.54382	6.63	14.2	83	239	2.81	5.16	1.34	1.19	3.58	0.23	91.675	40.5	14.647	43	58.5	0.04
267	0	1	0	1	1	2	0.7	0.7	4	107	0.4	0.04	34	7.8	35.4	2.33	1.83225	0.77	3.62	84	268	0.82	4.73	1.47	0.95	2.87	0.2	90.995	23.9	0.31639	173	20.1	0.034
268	1	0	1	0	1	3	10	0	4	99	1.09	0.19	73	6.6	30.1	11.17	2.87921	10.27	16.2	243	352	3.64	4.7	1.69	0.91	3.01	0.193	7.07	198.2	1.987	220	11.1	0.12
269	1	1	0	1	1	2	10	1	4	92	2.31	0.53	30	6.45	36.4	2.69	2.19226	2.63	11.8	155	384	1.6	4.16	1.56	0.71	3.01	0.238	28.75	39.52	1.424	205	10	0.831
270	0	0	0	1	1	3	2	2	4	105	0.6	0.04	99	7.92	29.2	5.777	2.82183	10.13	8.3	134	243	0.9	5.32	1.29	1.07	3.75	0.201	36.47	62.43	7.65964	264	10	0.02
271	0	1	0	0	1	3	20	20	3	114	3.89	0.16	54	6.2	37.9	6.16	2.40473	3.25	5	88	405	1.4	2.6	1.06	1.25	1.22	0.48	81.317	67.75	0.182	80	17	0.01
272	0	1	0	0	0	2	10	2	4	111	0.1	0.05	47	9.36	26.6	4.62	2.87755	10.66	5.9	80	234	1.33	5.94	2.3	1.14	4.25	0.191	73.26	42.71	1.919	137	13.1	0.01
273	1	1	0	1	1	1	5	0	5	81	4.45	0.69	141	5.89	29.8	1.32	2.65208	3.25	5.8	361	364	4.32	5.93	1.7	0.76	3.13	0.128	22.64	98.7	35	264	6	0.831
274	1	0	0	1	0	2	7	0	4	105	0.5	0.1	98	7.14	26.1	7.68	2.82183	10.33	7.1	115	333	1.67	7.27	1.54	0.99	5.61	0.136	49.62	62.12	0.06	746	16.7	0.01
275	0	1	0	1	1	1	4	1	4	112	2.95	0.093	32	5.5	49.7	0.83	1.15806	0.24	8.4	83	397	0.98	3.71	1.13	0.88	2.25	0.237	102.581	27.71	5.253	48	15	0.01
276	1	1	0	1	0	2	8	0.2	4	104	2.6	0.077	28	7.53	38.9	1.22	2.19226	0.73	30.95	215	373	3.56	5.03	1.56	0.91	3.52	0.18	22.48	40.5	0.05281	36	28	0.037
277	1	1	0	0	1	2	2	1	4	113	3.31	0.14	23	5.81	39	3.93	2.24286	2.39	7.1	147	481	1.78	4.75	6.96	1	1.69	0.21	49.809	57.62	7.453	82	11	0.01
278	1	1	0	1	0	3	15	3	3	93	14.97	0.51	101	8.14	43.1	0.14	2.33672	4.21	18.98	479	706	4.32	3.76	2.08	0.6	1.98	0.159	7.07	255.9	11.392	48	14.9	0.5
279	1	1	0	0	1	2	24	0	4	68	12.6	0.36	18	7.2	20.8	0.14	2.38391	4.32	18.5	226.6	495	2.59	1.68	0.75	0.44	0.76	0.261	27.22	23.9	7.82163	94	17	0.014
280	1	0	1	0	1	2	20	1	5	89	0.1	0.023	6.4	5.2	35.5	0.93	2.09216	1.27	21.75	325	532	2.66	4.16	1.86	1.39	2.34	0.334	14.63	107.8	9.134	870	18.2	0.058
281	1	0	1	0	1	2	17	7	4	92	7.79	0.698	13	6.81	37.9	3.28	2.16176	2.39	19.32	385	272	3.59	5.59	3.03	0.85	3.74	0.152	11.05	92.99	34.011	192	17.9	0.412
282	0	0	1	0	0	2	15	3	4	103	1.56	0.04	71	10.2	37.9	2.16	2.40574	2.39	5.2	101	381	1.25	4.74	3.99	0.78	2.63	0.164	53.609	32.2	0.8824	342	25.8	0.01
283	1	1	0	0	0	2	15	1.5	4	84	2.53	0.067	141	6.38	25.74	7.06	2.83017	8.11	20.39	521	475	3.56	8.1	1.6	2.04	4.72	0.251	4.75	132.2	35	1457	28.1	0.622
284	1	1	0	1	1	2	17	0.1	4	105	1.42	0.01	38	6.29	29.2	3.75	2.24286	4.01	9.9	101	526	1.94	4.4	1.5	0.9	2.83	0.204	56.97	39.22	0.61	207	10	0.007
285	1	1	1	0	1	2	10	6	4	133	13.8	0.23	100	11.6	18.4	14.77	2.74518	9.63	8.5	229	281	3.17	9.23	1.05	1.4	5.19	0.151	28.034	72.75	1.28501	459	57	0.026
286	1	1	0	1	0	1	9	2	5	74	2.2	0.2	39	6.38	32.1	3.19	2.38391	3.72	23.74	884	514	4.99	6.33	2.43	1.26	4.2	0.199	6.64	172.8	5.043	2133	30.1	0.134
287	1	0	0	0	1	1	3	0.5	4	112	2.95	0.048	73	5.94	32.2	16.9	2.81502	9.77	10.6	134	300	1.39	6.96	1.11	2.25	5.1	0.32	49.62	14.49	35	160	12	0.108
288	0	1	0	1	0	2	11	0	4	94	0.78	0.04	78	13.02	22.8	4.35	2.43136	4.56	4.9	54	274	0.82	9.83	1.31	2.14	7.23	0.217	36.47	30.56	0.431	100	19.8	0.01
289	0	1	0	0	0	3	0.8	10	4	94	0.5	0.04	92	8.7	26.1	4.34	2.74322	3.72	9.16	67	285	1.49	9.5	2.02	1.94	7.11	0.204	82.86	24.05	0.763	26	26.8	0.012
290	0	1	1	0	1	2	10	1	4	120	2.4	0.2	10	7.5	38.3	6	2.50799	4.55	10.1	152	305	1.59	7.15	1.44	1.61	5.22	0.225	46.337	35.6	1.48336	89	14.8	0.057
291	0	1	0	0	1	3	9	0.3	4	95	1.3	0.035	32	5.9	35.7	1.74	2.09216	0.95	9.8	102	369	1.41	3.31	0.56	1.01	2.12	0.305	67.076	32.37	1.48336	80	13.4	0.01
292	1	0	1	0	0	2	0	0	3	100	2.89	0.04	14	9.83	38.6	2.11	1.55775	1.89	9.1	119	269	1.45	4.45	1.83	1	2.49	0.224	47.47	23.9	5.253	51	9.9	0.035
293	1	1	1	0	0	2	15	20	3	100	0.97	0.04	78	7.1	40.1	1.02	1.73997	0.75	9.7	111	395	2.08	6.11	2.48	1.08	4.38	0.176	49.801	90.42	0.2274	136	12	0.01
294	0	1	1	0	0	3	0.5	0.4	4	124	0.86	0.124	43	10.2	30.2	1.21	1.38686	1.89	6.48	47	230	0.98	5.06	3.74	1.06	2.46	0.209	100.557	125.8	12.308	23	14.8	0.01
295	1	1	0	0	1	3	5	17	3	116	0.5	0.07	32	6.97	33.4	8.45	2.09454	5.09	9.7	150	299	2.21	4.02	1.75	1.1	2.35	0.273	21	68.79	0.431	233	9.9	0.01
296	1	1	0	0	0	2	20	7	4	89	1.7	0.179	52	7.7	31.6	7.98	2.89996	10.19	9.7	192	356	2.33	7.07	3.2	1.36	4.61	0.192	21	78.6	11.3343	220	15	0.045
297	1	1	0	0	0	2	3	0	4	66	17.1	0.2	87	5.8	23.4	5.04	2.47249	4.03	5.7	60.1	229	0.82	4.67	1.31	1.21	2.96	0.259	53.848	50.6	0.3375	91	12.8	0.022
298	0	0	1	0	1	3	6	0	4	124	0.2	0.04	29	10.8	27.5	4.23	2.21524	2.27	7.1	80	236	1.6	4.68	1.15	1.22	3	0.26	88.1	54.95	9.959	112	18.5	0.04
299	1	1	1	0	1	2	18	28	5	107	7.5	0.24	153	5.15	24.5	10.02	2.76952	6.56	19.5	226	407	4.06	12.19	5.98	0.93	9.66	0.076	27.5	141.1	35	1457	58.5	0.095
300	1	1	0	0	1	2	2	0.5	4	88	0.5	0.2	108	7.38	22.4	14.96	2.76597	10.87	6.9	126	299	1.53	6.22	0.79	2.01	4.12	0.323	55.73	22.97	1.43	137	58.5	0.017
301	0	1	1	1	0	3	1	1	4	99	0.6	0.089	69	7.56	40.9	3.19	2.36502	2.82	13.8	136	363	1.78	5.72	2.03	1.25	3.88	0.218	34.96	30.03	0.06	64	34	0.01
302	0	1	0	1	1	3	16	2	4	116	0.3	0.044	66	7.3	35.2	4.73	2.13056	2.76	9.8	178	364	2.16	3.83	2.03	0.77	2.52	0.201	34.455	25.1	0.42293	64	10	0.01
303	1	1	0	0	0	1	7	1	3	104	2.2	0.05	82	7.1	26.1	1.66	2.90907	13.76	7.86	125	318	1.36	7.28	2.8	1.46	5.38	0.2	77.82	69.19	0.3205	228	40.3	0.019
304	0	1	1	1	0	3	18	0	3	78	129.4	0.181	116	10.21	27.9	0.74	1.69557	0.81	3.52	63	169	1.26	4.48	1.77	0.71	2.86	0.158	86.18	55.36	1.689	23	14.9	0.01
305	0	0	0	1	0	2	8	2	1	114	15.89	0.04	3.5	6.69	37.2	1.24	0.9154	0.63	6.1	58	235	1.11	3.05	1.1	1.19	1.52	0.324	100.557	28.44	0.097	860	30.1	0.022
306	1	1	0	1	1	2	3	0	4	81	9.21	0.26	36	6.6	20.4	8.1	2.89996	9.26	22.6	184	368	2.22	7.64	2.29	0.93	6.18	0.121	35.315	68.34	9.462	198	15	0.01
307	0	1	0	0	1	3	6	0.1	5	125	1.3	0.064	21	7.9	40.7	5.22	2.49001	3.97	11.3	142	449	1.78	5.8	2.63	1.37	3.84	0.236	45.28	30.03	0.14526	137	16	0.015
308	1	1	0	1	1	3	14	0	5	90	101.9	0.29	133	17.18	21.6	4.66	2.81536	9.46	13.38	176	329	2.33	7.29	1.43	1.46	5.5	0.2	33.96	35.6	1.424	135	22	0.038
309	1	0	1	0	1	3	42	3	4	103.7	0.5	0.124	56	7.07	23.7	13.76	2.9335	7.49	7.57	115	258	1.59	6.72	1.63	1.71	4.54	0.254	58.43	118.7	0.3311	100	14.6	0.01
310	0	1	0	1	0	2	12	4	4	96	2.48	0.01	58	5.91	33.3	1.2	1.45758	0.63	9.3	93	290	1.04	5.08	1.14	1.33	3.2	0.261	94.26	57.43	0.182	40	6	0.012
311	1	1	1	1	1	2	0.3	0	4	134	0.65	0.047	9.9	6.4	41.1	6.13	2.54787	3.63	8.65	90	384	0.9	5.36	0.95	1.08	4.13	0.201	85.495	42.71	0.1365	439	10	0.007
312	0	1	0	0	1	2	0.3	0	4	121	0.43	0.11	46	10.2	22.9	9.17	2.55943	3.55	7.9	134	288	2.16	10.41	1.44	2.1	7.97	0.201	53.586	79.75	0.06	415	42	0.038
313	1	1	0	1	1	2	8	7	4	131	0.65	0.13	57	8.4	37.7	4.57	2.18216	2.44	12.95	159	393	1.83	5.72	1.49	1.28	4.23	0.223	40.33	65.71	0.1482	126	19.9	0.016
314	1	0	0	1	1	2	16	1	4	114	0	0.13	24	6.5	38.7	7.56	2.60502	4.83	9.8	210	436	2.18	4.58	0.95	1.17	3.13	0.255	30.55	109.6	1.198	394	27.9	0.01
315	1	1	1	1	0	2	7	0.5	4	92	0.78	0.375	34	5.5	20	6.17	2.66173	6.16	4.98	123	231	2.16	4.77	1.68	1.22	3.07	0.255	44.17	38.18	33.352	94	35.6	0.026
316	0	1	0	1	1	2	20	0.5	4	107	0.1	0.03	16	6.5	44.5	1.03	1.55775	0.55	9.1	103	240	1.36	2.82	0.6	1.2	1.32	0.425	72.12	18.6	0.258	52	13.8	0.01
317	1	1	0	0	0	2	0.5	3	4	86	8.4	0.122	23	7.31	32.9	2.22	1.38686	1.29	9.6	116	396	1.66	3.65	0.91	1.53	1.91	0.419	47.08	139.6	11.343	575	20.3	0.039
318	0	1	1	1	1	2	10	0	2	148	4.9	0.04	21	6.63	42.8	0.04	2.40574	3.73	8.98	153	413	1.68	4.39	1.2	0.96	3.25	0.218	43.35	33.17	0.03822	52	15	0.01
319	1	0	1	0	1	2	16	1	4	117	0.189	0.14	45	7.3	34.1	5.07	2.22727	2.27	8.6	126	486	1.74	5.99	1.15	1.64	3.82	0.273	57.73	22.97	0.1482	52	15	0.012
320	0	1	1	0	1	3	30	0.1	1	105	4.45	28.8	56	10.13	25.1	4.81	2.67388	10.5	14.54	101	346	2.29	6.93	0.69	1.7	4.5	0.245	60.01	54.48	3.123	53	15.2	0.01
321	0	0	1	0	1	2	10	0	1	128	1.95	0.032	12	11.66	24.6	1.24	1.72189	0.77	9.12	62	251	0.6	3.4	0.64	1.49	1.49	0.438	104.484	13.6	20.7788	80	21.4	0.019
322	0	0	1	1	1	2	20	0	3	137	0	0.06	8	7.7	45.2	0.69	1.51799	0.46	6.8	67	260	1.24	3.57	1.17	1.11	2.06	0.31	108.007	54.25	5.253	72	25	0.01
323	1	0	0	1	0	3	11	5	4	80	0.3	0.05	13	9.1	36.6	0.28	0.389166	0.81	13.4	273	267	2.36	4.69	3.81	0.93	2.6	0.198	15.27	35.6	0.6698	24	10	0.01
324	1	0	1	1	1	2	11	2	4	93	1.76	0.27	83	7.03	25.8	13.15	2.43136	4.26	16.64	455	357	4.32	5.5	1.8	1.45	3.1	0.263	11.125	162.9	3.588	183	28.1	0.05
325	1	1	1	1	1	2	10	2	5	81	1.06	0.175	42	6.57	25.7	6.63	2.62291	6.16	24.6	415	403	4.6	5.13	3.03	0.79	3.1	0.164	5.23	134.3	35	65	14.2	0.108
326	1	1	1	1	1	2	6	5	3	125	2.7	0.01	30	7.52	36.4	0.67	3.02748	6.29	5.9	70	332	1.08	6.26	1.91	1.71	4.94	0.322	85.495	29.03	13.506	102	19.8	0.038
327	1	1	0	0	1	2	3	6	5	72	159.61	0.783	135	5.6	29.8	5	2.47249	6.91	22.1	613	413	4.18	1.88	2.2	0.42	0.78	0.223	8.289	172.8	10.1564	39	6	0.086
328	0	1	0	0	1	3	10	5	4	106	0.6	0.01	29	6.9	32.9	2.9	2.83788	13.37	6.3	157	282	1.5	5.15	2.07	1.75	3.29	0.339	35.839	37.04	1.123	53	10	0.01
329	1	0	1	0	1	2	0.5	0	4	99	0.5	0.2	104	13.3	20.9	6.5	2.56407	6.42	9.9	106	390	1.41	7.07	1.54	1.46	5.17	0.206	77.82	125.8	11.343	1052	30.1	0.02
330	0	1	0	1	1	2	13	18	2	146	0.92	0.04	5.2	7.81	35.2	3.34	2.23213	2.27	5.21	87	268	1.24	2.77	1.11	1.15	1.28	0.415	82.45	43.3	0.1975	173	17	0.034
331	1	1	0	0	1	2	15	2	4	144	2.56	0.28	73	9.4	30.7	1.832	2.38391	8.33	25.4	786.7	387	3.94	3.8	1.27	0.99	2.34	0.26	7.07	105.8	3.588	207	10	0.622
332	0	1	0	1	1	2	13	0.5	4	131	1.5	0.02	10	7.63	37.8	1.03	1.59824	0.51	5.8	76	401	0.82	5.08	1.88	1.64	2.93	0.322	94.26	24.05	0.0385	81	20.1	0.01
333	1	1	0	0	1	2	10	5	1	86	1.14	0.2	44	7.11	25.4	3.54	0.454845	171.63	8.1	172	410	2.23	4.07	1.56	0.85	2.66	0.208	25.95	56.18	4.581	134	8.7	0.01
334	1	1	0	1	1	2	0.5	0.3	4	109	3.54	0.2	78	6.7	35.9	10.52	2.64583	5.74	12.1	190	350	2.03	4.86	1.02	0.95	3.42	0.195	37.16	35.1	0.14526	36	18	0.037
335	0	1	0	0	0	2	5	3	4	136	2.45	0.04	20	8.6	32	8.49	2.45143	3.94	3.7	45	373	1.05	8.16	13.29	0.88	2.31	0.107	114.95	25.03	0.06	66	12	0.01
336	1	1	0	0	0	3	20	3	4	96	1.34	0.17	87	10.78	32.6	7.82	2.97317	17.56	11.3	113	410	1.08	6.47	4.77	0.86	3.99	0.132	96.322	50.5	0.8743	220	28.4	0.01
337	1	0	0	0	0	2	8	0	5	81	3.06	0.2	45	6.88	31.5	5.03	2.58427	5.7	14.4	156	315	2.29	4.77	1.09	2.1	2.55	0.44	61.34	35.6	9.671	219	14.5	0.014
338	0	1	0	1	1	2	10	1	4	95	0.3	0.05	54	7.5	20.6	5.81	2.60126	6.96	11.6	152	278	1.32	6.64	1.41	1.84	4.61	0.277	46.663	35.6	0.437	219	12.5	0.028
339	1	0	1	0	0	1	10	0.8	4	123	0.3	0.25	25	7.2	18.7	3.94	2.52382	0.77	4.4	60	329	0.6	6	2.2	0.92	3.78	0.153	115.551	32.2	1.014	415	22.8	0.134
340	0	0	0	1	1	3	11	30	4	141	0.1	0.07	12	7.5	42.8	0.72	1.24279	0.74	5.8	68	180	1.24	3.76	1.47	1.06	1.28	0.251	96.62	32.37	0.097	136	14	0.01
341	0	1	1	1	0	3	9	4	4	94	0.1	0.2	16	8.24	27.7	7.11	2.90907	10.66	9.83	78	219	1.04	6.52	1.58	1.86	4.33	0.259	82.882	30.56	0.258	189	19.8	0.043
342	1	1	0	0	0	3	10	0	4	71	9.77	0.023	111	8.37	34.9	1.16	2.22727	2.29	18.6	301	424	3.37	4.32	1.35	1.07	2.87	0.247	18.53	46.78	0.9735	34	1.2	0.019
343	1	1	0	0	1	1	16	2	5	98	0.78	0.04	32	10.3	26.6	9.78	1.73799	2.92	12.55	174	390	1.78	6.49	1.49	1.12	4.62	0.172	37.16	41.5	0.1693	394	27	0.014
344	0	1	0	0	1	2	6	0	4	93	3.5	0.08	108	17.18	18.3	7.35	2.73957	12.25	15.8	139.4	308	2.28	8.98	2.61	1.1	7.3	0.122	51.81	56.19	1.15111	415	49	0.01
345	1	1	0	1	0	2	2	0.2	4	65	1	0.2	106	5.21	21.2	13.36	2.6399	5.7	6.4	171	267	1.8	8.93	2.85	1.62	5.99	0.181	43.069	33.44	13.506	622	57	0.01
346	0	1	1	1	1	3	20	18	4	94	1.72	0.09	21	6.3	31.9	7.65	2.66173	6.2	10.3	209	399	2.59	3.27	2.26	0.6	2.05	0.183	28.576	44.86	0.653	69	13.4	0.016
347	1	1	1	1	0	1	2	0.2	4	79	3.45	0.063	109	10.21	19.2	5.777	3.02748	11.4	6.6	160	264	1.53	14.36	6.53	1.1	11.57	0.076	36.47	42.78	4.581	622	18.8	0.01
348	1	1	1	0	0	2	12	1	4	108	0.5	0.02	45	7.4	27.2	19.02	3.03787	19.16	18.2	170	309	2.33	11.65	3.02	2.69	7.99	0.23	35.4	72.2	25	746	58.5	0.097
349	1	1	1	1	1	2	8	1	5	76	1	0.2	56	8.55	27.6	5.79	2.66346	5.85	15.1	308	361	2.34	8.78	2.59	1.59	6.42	0.181	17.69	48.56	0.4537	1534	16.5	0.01
350	1	1	1	1	1	3	20	0.2	5	78	4.6	0.08	116	6.5	30.7	9.01	2.87089	10.73	22.78	495	364	7.11	3.75	2.02	1.52	1.94	0.405	9	204.5	25	126	14.1	0.01
351	1	1	1	0	1	2	15	2	4	108	1.08	0.385	16	6.63	33.2	1.32	2.01119	1.91	10.73	132	373	1.59	4.35	2.06	0.76	2.35	0.174	35.018	102.1	5.503	24	13.8	0.01
352	0	1	1	0	0	2	13	0.3	4	122	2.9	0.181	37	8	37.8	1.21	1.56561	0.68	4.82	54	221	0.71	4.48	1.43	1.91	2.17	0.426	108.253	23.21	7.453	377	25	0.01
353	0	1	0	0	0	2	10	1	5	126	1.3	0.04	61	8.7	39	3.29	2.53474	13.76	9.8	114	332	1.73	5.76	2.91	1.43	3.15	0.248	48.08	35.1	0.293	135	15	0.012
354	0	1	1	1	0	3	2	10	2	127	2.92	0.17	7.8	7.55	49.8	0.86	1.69557	3.96	6.46	63	293	1.24	4.08	2.12	0.86	2.46	0.21	85.5	48.56	0.1543	69	14.8	0.012
355	0	0	1	0	1	2	10	0	5	149	0.2	0.19	31	7.81	31.9	10.68	2.81502	10.66	4.93	107	425	1.61	5.5	2.3	1.06	3.64	0.192	70.84	59.93	0.1543	173	20.1	0.012
356	0	1	0	1	0	2	3	3	4	95	1.48	0.01	78	8.76	34.1	1.76	2.67541	3.02	7.99	69	209	0.88	8.53	2.07	1.71	6.46	0.2	73.26	118.7	0.083	207	28	0.016
357	1	0	1	1	1	1	5	1	4	89	2.89	0.195	43	7.71	20	9.67	2.96249	17.56	10.9	276	363	3.49	8.35	1.77	1.94	6.18	0.232	29.464	62.1	12.496	2955	67	0.01
358	0	1	0	1	1	2	2	0.1	4	78	0.92	0.04	22	5.9	38.2	2.84	1.43345	6.91	10	227	371	2.29	4.03	1.39	0.81	2.8	0.2	34.77	90.42	2.74	233	25	0.01
359	0	0	1	1	1	2	3	1	4	122	0.1	0.04	23	6.1	34.7	6.85	2.54013	4.56	8.14	94	391	1.21	3.86	1.28	1.11	2.47	0.287	84.61	58.2	0.1962	127	1.92	0.1
360	0	0	1	1	0	3	4	0	4	89	0.81	0.04	36	6.2	32	4.01	1.06408	0.63	8.3	85	315	1.21	6.9	1.71	2.03	4.56	0.294	73.14	39.76	0.2568	312	15.7	0.026
361	1	1	1	1	1	2	16	0	4	119	1.45	0.1	11	8.9	38	2.07	1.59483	1.52	8.1	85	320	1.17	5.45	0.84	1.73	3.63	0.317	66.802	19.17	0.2568	49	62.8	0.041
362	0	0	1	1	1	2	16	2	4	82	1.63	3.36	37	5.06	25.7	8.23	2.96075	8.01	12	205	382	2.28	5.89	1.34	1.87	4	0.317	41.645	89.73	2.628	614	0.93	0.01
363	0	1	1	1	1	2	3	0	4	74	0.54	0.3	51	6.5	31.1	4.5	2.75137	6.64	8.9	73	394	1.36	4.76	0.63	1.37	3.29	0.287	99.005	37.9	5.057	77	19.3	0.014
364	1	0	1	0	1	2	3	1	5	66	1.6	0.23	43	4.75	26.42	10.11	2.58704	4.69	32.22	537	469	4.36	4.48	2.1	0.67	2.91	0.149	9.48	92.26	19.252	973	10.1	0.034
365	0	0	1	0	1	2	20	3	4	105	0.1	0.039	38	6.3	45.5	2.45	1.95799	1.89	12.5	139	492	1.27	5.08	1.55	1.33	3.37	0.261	49.495	25.9	0.774	173	62.8	0.041
366	1	1	1	0	1	3	8	8	4	81	4.72	0.062	72	6.8	30.6	4.35	2.80267	12.56	9.46	191	327	2.1	3.07	0.79	0.93	2	0.302	46.146	125.1	15	210	64.5	20.207
367	0	1	0	0	1	2	0.9	0	4	110	0.7	0.11	44	5.6	23.5	10.12	2.6048	5.79	6.1	167	374	2.55	7.3	1.52	1.1	5.04	0.15	41.645	36.99	0.1529	165	28	0.091
368	0	1	0	1	0	2	12	0	4	77	0.85	0.2	132	11.6	25.8	12.05	2.71896	5.34	11.69	108	197	1.72	6.38	0.99	2.41	3.52	0.377	52.79	152.8	2.628	197	61.3	0.01
369	1	1	1	1	1	3	23	4	5	126	0.72	0.08	14	9.85	24	5.27	2.64506	5.62	6.81	159	312	1.05	6.62	1.29	1.08	5.41	0.163	36.81	139.6	0.7292	81	43	0.032
370	0	1	1	1	0	3	3	3	4	115	1	0.04	35	10.7	34.9	1.16	0.866287	0.78	11.41	106	365	2.1	6.58	2.01	0.98	4.86	0.148	47.92	96.3	0.8707	40	21.3	0.013
371	0	1	0	1	0	3	14	1	3	108	98.2	0.14	39	8.16	42.1	0.35	2.34492	3.46	15.4	219	460	2.33	3.85	2.79	0.64	2.21	0.166	36.422	27	0.853	236	17	0.07
372	0	1	0	0	0	2	16	0.1	4	98	0.3	0.3	59	7.4	29.8	5.54	2.8072	9.15	12.95	113	295	1.11	8.86	2.19	1.78	6.96	0.2	47.25	43.98	6.757	311	22.1	0.01
373	0	1	1	1	1	2	11	0	4	104	3.2	0.3	49	9.6	20.3	4.628	2.90211	5.34	8.63	170	289	1.23	5.13	0.88	2.1	3	0.409	45.064	152.8	9.672	522	23.5	0.067
374	0	1	0	0	1	2	4	0	3	91	122	0.2	114	7	39	0.7	1.61426	0.82	14.3	154	393	2.1	4.36	1.23	0.83	2.77	0.19	44.974	39.41	0.40648	209	9	0.115
375	0	1	1	1	0	2	10	10	4	86	0.84	0.09	51	7.87	35	0.97	2.65284	6.34	11.34	181	376	2.1	3.55	1.12	1.17	1.84	0.329	72.533	96.3	24.731	530	43	0.041
376	0	1	0	0	1	3	30	0.1	4	96	17.12	0.04	57	7.3	40.5	2.01	2.65651	6.34	8.5	182	420	2.29	3.88	1.85	0.76	2.27	0.195	32.842	100.5	0.274	81	9	0.034
377	0	1	0	0	1	3	6	6	2	144	3.11	0.054	20	7.1	48.7	0.83	1.9815	1.89	9.3	108	505	0.69	5.73	3.67	0.89	3.25	0.155	61.724	100.5	0.8707	49	19.4	0.032
378	0	1	1	1	0	2	6	0	3	63	1.4	0.01	32	7.1	29	5.96	2.57553	6.5	6.1	55	438	0.94	3.58	1.4	1.09	2.23	0.304	107.601	28.2	4.00004	69	11	0.01
379	0	0	0	0	0	2	11	0	2	147	2.3	0.04	46	9.7	33.7	18.54	2.80267	11.33	3	48	287	0.81	6.54	2.76	1.35	3.76	0.206	107.131	27	0.11219	43	15	0.02
380	1	1	0	1	1	3	3	0.1	5	122	1.25	0.2	6.6	8.4	38.1	1.02	2.21643	1.23	13.83	198	442	2.33	3.32	0.76	1.06	2.05	0.319	14.064	110.2	0.40648	205	18.5	0.01
381	0	1	0	0	0	2	14	0	4	110	0.78	0.339	36	8.09	26	8.94	2.77316	8.16	5.82	70	258	1.36	11.13	5.66	1.55	7.59	0.139	105.701	45.7	6.757	43	18.5	0.091
382	1	1	1	0	0	2	15	3	5	74	11.5	0.18	113	6.5	36.6	4.92	2.65284	7.32	15.2	376	368	2.33	5.5	2	1.04	3.7	0.189	11.601	200.3	3.86544	236	13	0.037
383	1	1	0	0	1	3	9	0.5	4	75	2.21	0.34	63	4.9	23.1	9.79	2.63205	8.16	10.8	196	326	2.29	5.94	1.65	1.46	3.9	0.245	30.45	10.69	15	530	15	1.06
384	0	1	0	0	1	3	6	30	3	161	1.4	0.06	7	9.8	44.1	1.26	1.32118	3.46	7.8	94	318	1.05	4.84	2.9	1.17	2.83	0.241	68.532	152.8	0.04394	136	43	0.115
385	0	1	0	1	0	2	5	0.2	4	113	9.57	0.124	65	8	29.8	13.07	2.64108	5.79	14.7	83	346	1.59	12.53	4.92	2.01	8.64	0.16	120.098	45.7	4.00004	33	20.9	0.01
386	0	0	0	1	0	3	10	0.2	4	113	2.3	0.072	91	7.74	40.2	5.95	2.71896	7.65	8.58	113	416	1.72	5.09	2.36	1.35	3.06	0.265	24.972	43.59	0.853	127	13.8	0.012
387	1	1	0	0	0	2	12	1	4	61.6	0.4	0.04	67	8.8	27.9	8.82	2.96075	8.62	11.3	242	364	2.28	6.99	2.33	1.29	4.79	0.184	50.686	106.5	0.1529	165	20.9	0.014
388	1	1	0	1	0	3	30	30	4	90	5.01	0.08	108	6.8	38	3.47	2.34784	4.58	30.35	524	424	5.76	5.19	1.17	1.75	2.89	0.337	6.668	260.5	0.40648	95	18	0.012
389	0	1	0	0	0	2	6	4	4	121	1.14	0.04	14	4.43	43.9	0.51	1.82243	0.76	11	106	353	1.44	4.05	0.88	1.5	2.44	0.37	61.87	74.72	0.40648	54	9	0.115
390	1	1	0	0	1	1	5	0.1	4	79	1.9	0.17	111	6.3	33	9.65	2.7277	7.65	14.1	354	372	2.54	3.26	1.95	0.94	2.04	0.288	17.42	94.64	0.5397	973	64.5	0.041
391	1	1	0	1	0	3	16	16	5	99	1.73	0.23	42	6.85	31.1	7.55	2.61108	6.97	12.78	280	566	3.01	5.65	4.88	0.81	3	0.143	13.33	128.7	19.252	16	10.1	0.04
392	1	1	0	1	0	3	18	18	4	141	1.1	0.04	55	12.8	33	9.19	2.63205	6.77	6.43	49	386	1.06	6.64	1.88	1.5	4.8	0.225	100.59	18.82	0.2568	336	18	0.041
393	1	0	0	1	0	2	30	10	4	74	0.3	0.04	85	8.3	26.2	5.23	2.56004	5.36	10.89	151	269	2.1	6.05	1.76	1.35	4.33	0.223	30.589	39.8	13.0339	49	15	0.012
394	0	1	0	1	0	1	2	0	4	135	1.34	0.062	83	10.9	40.1	4.71	2.71896	6.74	5.1	44	236	1.03	9.21	10.62	1.2	4.72	0.13	76.86	81.78	0.2568	33	9	0.037
395	0	1	0	1	0	3	20	20	2	114	0.5	0.28	27	6.6	45.9	1.56	2.21564	2.75	10	81	341	1.05	6.55	2.24	1.51	4.4	0.23	66.802	43.98	0.2568	151	19.4	0.013
396	0	1	1	1	1	3	15	1	4	105	2.76	0.295	64	8.06	29.2	3.81	2.6048	6.34	8.4	129	418	1.44	4.58	5.53	0.65	1.52	0.141	65.42	25.9	0.853	120	62.8	0.021
397	0	1	0	1	1	2	4	1	4	79	0.3	0.04	25	6.07	53.3	3.2	2.64506	6.64	16.49	315	351	2.2	4.41	1.29	1.22	2.23	0.276	50.686	58.2	1.319	205	8	0.115
398	0	0	0	1	1	3	13	4	2	113	4.9	0.04	30	10.09	22.1	4.3	1.98457	1.89	8.35	168	319	1.97	4.23	1.56	1.22	2.57	0.288	33.25	139.6	0.5397	331	19.4	0.021
399	0	1	0	1	1	2	3	0	4	118	3.3	0.12	25	6.6	25	3.94	2.18551	6.5	7.92	103	257	2.1	5.55	1.3	1.93	3.62	0.347	73.561	81.78	0.35406	48	9	0.091
400	1	0	0	0	0	3	10	4	5	102	0.8	0.14	101	13.02	35.8	4.07	1.92881	2.17	17.14	338	386	3.24	7.82	2.41	1.04	6.02	0.132	11.47	149.7	3.297	77	17.2	0.012
401	1	0	0	1	0	3	15	0.5	5	77	4.76	1.141	113	6.65	27.7	6.77	2.90211	11.33	13.2	228	344	2.29	6.2	0.87	1.37	4.33	0.22	12.41	94.64	4.00004	44	24	0.04
402	0	0	1	0	1	2	12	0	4	112	13.848	0.061	11	9.9	37.3	0.417	1.762	0.63	6.59	72	205	0.85	5.73	0.94	2.83	2.81	0.493	103.4	74.72	2.865	48	23.5	0.021
403	0	0	0	1	1	3	3	3	4	126	4.98	0.23	14	7.2	38.25	0.55	2.21643	1.52	4.99	60	399	0.85	4.81	3.08	0.83	2.92	0.172	96.354	28.2	3.597	49	13	0.07
404	0	1	0	0	0	3	10	10	4	76	5.18	0.665	25	8.4	29.6	0.69	2.74394	8.62	12.72	189	387	1.69	2.93	1.26	0.43	1.72	0.146	72.533	88.28	24.731	41	10.2	0.4
405	0	0	1	1	0	2	15	10	4	118	0.2	0.054	24	6.2	40	4.41	2.38959	3.04	13.2	218	459	2.55	6.08	2.03	1.2	4.12	0.197	22.424	59.66	2.047	336	17	0.4
406	0	1	0	1	0	2	13	2	4	126	0.64	0.01	18	7.1	28.4	6.59	2.54013	4.56	5	68	328	0.81	5.53	2.21	0.71	4.06	0.128	87.398	28.2	0.274	312	25	0.07
407	0	1	0	1	1	3	16	12	3	147	0.5	0.072	5	5.48	59.3	1.65	1.9815	1.35	11.79	157	407	1.72	3.62	1.43	0.96	2.1	0.265	23.918	90.36	2.53547	127	43	0.021
408	0	1	0	0	0	2	0.5	0	4	118	0.1	0.71	31	12.44	31	5.44	2.77316	8.09	6.9	58	193	0.81	13.49	2.97	1.51	7.19	0.229	103.4	19.17	35	311	9	0.012
409	1	0	0	1	1	2	10	4	5	85	84.9	0.295	124	6.37	31.1	8.03	2.56004	11.32	14.9	553	408	3.91	4.73	0.87	1.27	2.99	0.268	12.41	109.4	35	149	7	0.312
410	0	1	1	1	1	3	18	12	5	93	22.02	0.397	81	11.9	27.1	5.25	2.6626	12.56	14.28	171	216	2.33	6.64	1.37	0.91	4.86	0.137	50.74	44.02	0.2568	226	16.3	0.032
411	0	1	0	0	0	2	0.1	0.1	4	102	1.34	0.11	91	8.7	22.2	9.78	2.5613	15.08	7.1	120	411	1.44	6.42	2.74	1.05	4.61	0.163	46.804	21.56	0.2568	331	9	0.037
412	1	1	0	1	0	2	4	0	4	82	38.99	0.21	104	7.06	24.7	4.44	2.55682	6.93	27.12	541	371	3.91	2.16	0.52	0.94	0.98	0.435	66.7	50.02	2.865	530	18.5	0.081
413	0	1	1	0	0	2	6	0	2	86	0.33	0.08	8.5	6.5	42.8	0.25	2.20898	1.52	14.2	186	399	2.21	4.02	0.78	1.37	2.57	0.34	26.231	88.91	3.597	209	43	11.02
414	0	1	0	0	1	2	12	1	4	93	0.87	0.01	109	8.9	17.4	7.1	2.71896	8.16	4.8	103	194	1.27	8.52	0.95	0.92	7.19	0.107	73.14	1.09	0.1529	336	17.2	0.012
415	0	0	0	1	0	2	8	0.2	5	98	0.5	0.04	42	8.1	24.1	0.25	2.58704	2.03	6.57	87	293	1.72	6.11	3.46	1.24	2.57	0.128	26.231	152.8	3.597	43	15	0.013
416	1	1	1	0	0	3	18	6	4	97	1.984	0.029	83	4.8	33.9	7.94	2.85458	11.32	32.8	548	356	3.47	5.46	1.95	0.9	3.86	0.164	6.668	37.63	8.59732	16	28	0.04
417	0	0	1	0	0	2	22	20	5	113	0.3	0.23	33	8.3	36.3	3.63	2.34492	2.22	8.98	95	322	1.27	4.21	2.41	0.98	2.82	0.232	57.868	39.17	5.057	33	25	0.014
418	0	1	1	0	0	3	10	10	5	100	10	0.04	46	7.3	36.4	2.32	2.21564	0.77	16.71	202	313	2.1	5.15	1.69	1.06	3.59	0.205	20.77	128.7	3.297	49	16.9	0.031
419	1	1	1	1	1	2	10	0.1	4	102	0.92	0.3	14	10.68	35.39	2.7	1.59483	2.03	7.6	105	240	1.17	4.94	0.99	1.54	3.18	0.311	113.196	19.17	24.731	209	20.9	0.026
420	0	1	1	0	1	2	3	0.1	5	105	1.42	0.04	26	5.6	30.1	8.51	2.57553	4.69	7.7	124	372	1.54	4.12	1.38	1.13	2.45	0.274	61.82	73.94	0.5397	57	0.93	0.115
421	1	1	1	1	1	3	0.5	10	1	115	2.9	0.02	114	8.4	28.6	0.92	0.866287	0.25	30.21	693	933	3.24	1.55	2.26	0.26	0.43	0.167	41.912	170.8	7.997	29	13	0.028
422	0	1	0	1	1	2	6	0.1	2	150	1.81	0.061	8	6.6	50.8	0.85	1.32118	2.82	4.8	74	479	1.62	4.31	3.19	0.83	2.27	0.332	73.561	45.7	0.1529	16	6.5	0.115
423	1	0	1	1	1	2	3	0.5	5	98	10.63	0.34	99	6.06	22.8	10.29	2.76315	13.99	11	331	341	1.95	4.91	1.71	1.1	3.24	0.224	15.41	10.69	7.997	50	13	0.041
424	0	1	0	1	1	3	10	10	3	86	0.5	0.04	14	5.6	35.8	3.94	2.34784	2.72	16	193.4	361	1.68	4.47	0.66	1.94	2.53	0.434	30.09	44.69	0.40648	311	61.3	0.115
425	1	0	0	1	0	3	10	0	4	74	15.11	0.04	17	6.7	31	4.51	1.61426	6.64	10.6	148.3	557	3.06	3.48	1.52	0.95	2.1	0.272	6.668	64	25	54	10	0.1
426	0	1	1	1	0	2	26	0	4	102	0.5	0.2	11	9	33.1	2.97	2.65651	0.21	10.2	62	290	1.11	6.71	0.61	2.65	3.97	0.394	99.005	19.17	0.53171	40	62.8	0.07
427	1	1	0	0	0	2	9	2	4	93	0.5	0.056	91	7.7	29.3	11.3	2.90211	11.94	11.9	306	370	1.69	6.17	1.58	1.58	4.32	0.256	14.369	63.05	21.4309	173	18	0.012
428	0	1	0	1	0	2	5	0.1	4	99	0.5	0.056	67	7.39	24.5	12.89	2.55682	8.16	4.9	73	299	1.23	6.65	1.9	1.2	4.76	0.18	86.57	21.56	0.04394	805	125.2	0.02
429	0	1	1	1	1	3	20	10	5	123	2.21	0.04	49	8.4	34.9	2.02	2.24768	2.45	20.54	245	344	2.21	3.82	0.8	1.3	2.32	0.34	46.146	62.63	25	49	62.8	0.01
430	0	1	0	1	0	1	10	3	4	94	4.6	60	141	10.3	26	14.12	2.80267	4.56	7.2	118	289	1.11	10.11	6.83	1.36	6.56	0.134	50.882	29.87	9.672	197	17.2	0.04
431	0	1	0	0	1	2	10	0.4	4	119	0.28	0.2	54	7	36.1	6.704	2.75137	6.97	9.6	162	393	1.69	5.65	1.53	1.48	3.19	0.261	45.064	43.59	0.1962	201	28	0.041
432	0	1	0	1	0	2	6	0	4	93	1.2	3.36	41	5.27	38.6	6.13	2.5682	5.79	19.6	329	261	2.54	6.19	2.11	1.04	4.44	0.168	47.92	27	11.781	1055	125.2	0.012
433	1	1	0	1	1	1	0.7	0	4	93	1.4	1.141	68	6.56	43.1	2.31	1.32118	6.5	4	58	414	0.81	4.7	0.54	1.1	3.29	0.34	14.064	115.5	2.53547	77	9	0.115
434	0	1	1	1	1	2	10	10	4	154	1.52	0.056	14	7.2	25.9	9.58	2.64108	8.16	8.37	88	324	1	4.42	1.53	0.9	3.18	0.203	84.818	19.44	0.35406	120	18.5	0.07
435	0	1	0	1	1	2	8	2	5	96	0.5	0.665	49	6.8	34.4	2.1	2.24768	1.52	15.8	231	422	2.13	4.28	0.78	1.2	2.7	0.28	26.97	125.1	0.274	69	13.8	0.012
436	0	1	0	0	1	2	18	0.3	4	115	15.6	0.04	50	6.36	28.6	13.37	2.74394	9.83	11.1	114	361	1.42	4.26	2.73	0.72	2.8	0.169	61.16	22.36	4.00004	120	24	0.034
437	0	1	0	0	1	2	10	0.2	4	100	0.6	3.36	141	11.6	17.8	9.7	2.82113	10.16	12.6	99	330	1.36	8.51	1.52	1.57	6.69	0.184	30.09	152.8	6.757	2054	64.5	0.4
438	0	1	0	1	1	1	8	4	3	160	5.5	0.09	7	9.8	44	2.62	1.59726	0.61	4.4	78	340	0.94	3.94	3.33	0.5	2.54	0.126	120.098	22.78	0.274	120	25	0.115
439	0	1	1	0	0	1	1	1.5	5	109	90.49	0.04	47	6.9	31.9	6.75	2.74394	4.56	14.3	93.9	572	3.16	6.39	0.68	3.56	2.62	0.557	24.972	18.82	25	54	28	0.01
440	0	0	0	1	1	2	20	0	4	99	0	0.04	62	14.1	23.5	5.59	2.55682	3.9	9.74	74	333	1.06	6.65	0.55	2.62	4	0.393	102.96	18.82	2.28	331	62.8	0.02
441	0	1	1	1	1	2	20	3	4	107	3.8	0.124	42	7.5	33.7	4.29	2.30103	3.46	7.44	161	330	2.2	9.28	2.91	1.16	6.83	0.125	40.58	36.84	0.1529	805	19.4	0.041
442	1	1	1	1	0	3	2	40	3	86	18.5	0.04	108	8.4	41	4.1	2.90211	12.56	30.43	438	550	2.85	5.26	1.57	0.83	3.98	0.157	17.42	208.8	25	16	6.5	0.01
443	1	1	0	1	1	2	13	0.5	5	91	2.42	0.2	52	7.27	32.7	4.53	1.82243	1.8	23.76	372	413	3.01	6.44	5.71	0.85	2.58	0.131	6.668	115.5	0.348	81	18.5	0.031
444	0	1	0	0	1	2	7	0.5	4	113	0.1	0.04	91	8.32	27.5	11.97	2.72055	8.01	9.35	117	334	1.54	5.58	3.46	1.28	3.31	0.229	65.39	22.36	0.04394	120	62.8	0.115
445	0	1	0	1	1	2	8	10	1	119	0.42	0.029	10	9.1	42	1.62	2.21643	0.61	6.08	71	322	0.91	4.54	3.43	1.12	2.21	0.246	120.098	44.69	0.1962	48	43	0.1
446	1	0	0	1	1	2	3	3	5	90	3.24	0.124	68	5.59	25.7	6.21	2.6048	5.79	29.95	651	466	4.39	2.9	0.91	0.82	1.94	0.282	44.84	142.4	2.865	973	43	0.037
447	0	1	0	0	0	2	0.3	0	4	96	1.34	0.11	125	13.9	26.7	5.5	2.61108	8.16	5.9	62	393	1.42	11.09	9.36	1.13	6.15	0.101	105.466	17.29	0.8707	50	22.1	0.067
448	1	1	1	1	1	1	6	0	4	95	1.89	0.04	28	8.47	25.5	4.78	2.65896	5.34	21.2	373	363	1.68	5.49	0.91	2.5	2.67	0.455	50.686	72.21	25	29	10.1	0.067
449	1	1	0	0	1	2	0.5	20	5	99	12.5	1.141	68	5.6	28.1	8.83	2.18551	0.25	19.6	367	457	2.85	4.4	1.48	1.37	2.58	0.311	15.41	144.9	14.046	42	10.1	0.04
450	0	1	1	0	1	2	9	0.2	4	86	1.22	0.02	25	8.33	31	4.47	2.21389	2.85	9.96	134	407	1.62	5.55	2.13	1.1	4.21	0.198	19.7	68.23	0.04394	42	0.93	0.07
451	1	1	1	1	1	2	10	5	1	101	1.55	0.18	11	8.16	42.5	0.16	2.21564	0.76	19.85	275	338	3.16	2.97	0.67	1.2	1.67	0.404	21.09	194	25	530	9	0.4
452	1	1	1	0	1	2	4	0	4	147	0.6	0.3	78	8.2	26	9.62	2.96075	10.4	7.1	111	356	2.54	13.74	6.55	1.24	9.61	0.09	65.42	36.99	0.8707	16	6.5	0.014
453	0	1	0	1	1	2	7	7	4	123	12.73	0.01	63	5.4	25.8	7.59	2.6626	6.93	5.1	119	388	1.06	4.48	1.21	1.12	3.27	0.25	64.52	56.1	0.5397	136	61.3	0.026
454	0	0	0	1	1	1	0.3	0	2	141	0.78	0.28	9	6.36	41.8	0.21	2.21643	0.21	6.7	85	270	0.93	3.56	1.1	1.1	2.37	0.308	50.72	74.72	3.597	83	61.3	1.06
455	0	1	1	1	1	2	15	4	4	126	17.12	0.04	68	6.7	43.1	2.93	1.06408	3.46	11.1	58	420	1.62	6.64	2.72	1.04	4.86	0.237	76.86	200.3	0.1962	50	1.92	0.02
456	1	1	1	0	0	3	14	1	5	106	1.7	60	99	7.6	44.7	1.05	1.59483	0.77	13.6	243	385	1.97	4.33	2.43	1.15	2.7	0.265	23.918	125.7	2.53547	54	1.92	1.06
457	0	0	1	1	0	1	0.5	0	2	97	1	0.04	41	7.71	36.6	0.69	2.34784	2.26	5.27	37	233	0.69	3.49	1.89	0.89	2.06	0.255	73.14	88.28	13.0339	151	9	0.1
458	0	1	1	1	1	2	17	0	4	97	0.89	0.665	67	6.43	30.9	12.99	2.76315	8.62	13.28	176	247	1.69	7.96	1.89	1.26	6.22	0.158	36.95	29.87	9.672	236	19.4	0.012
459	0	1	0	1	1	2	2	0.1	2	135	1.36	60	10	7.8	42.1	0.8	2.21643	0.43	4.59	64	347	1	4	3.21	0.76	2.25	0.19	105.35	39.17	13.0339	57	125.2	11.02
460	0	1	1	0	1	2	17	0.5	4	115	0.54	0.23	21	7.56	22.2	10.28	2.57553	6.34	8.6	75	233	1.11	3.81	1.16	1.51	2.19	0.396	106.05	96.3	0.35406	127	62.8	20.207
461	0	1	0	1	1	3	6	6	3	113	1.4	0.08	24	6.7	42.8	1.33	1.79435	1.23	10.9	191	349	1.62	2.3	1.43	0.75	1.06	0.326	32.088	74.72	99.705	81	10	0.081
462	1	1	0	0	1	2	10	2	4	114	10.5	0.43	94	7.02	34.1	3.57	2.51055	0.82	9.19	122	452	1.69	4.04	1.25	0.96	2.97	0.237	14.064	41.9	99.705	50	25	0.261
463	0	1	0	1	0	2	13	13	4	108	7.4	0.04	119	7.65	25.7	7.07	1.06408	4.56	5.9	118	224	1.69	5.08	357	2.82	6.03	0.555	44.84	1.09	0.8707	522	28	0.081
464	0	0	1	0	0	2	6	9	1	116	3.25	0.339	60	12.2	21	0.64	1.06408	4.37	4.43	50	323	1.36	9.52	1.74	1.63	7.14	0.171	105.701	21.56	3.597	136	28	0.013
465	1	1	1	0	1	2	18	0.5	4	106	0.05	1.141	32	8.1	30.8	7.9	2.8072	6.74	7.5	82	263	1.59	5.46	1.29	1.54	3.49	0.282	96.354	149.7	24.731	209	8	0.4
466	0	1	1	0	1	2	15	0.5	3	91	3.2	0.71	68	12.2	31.2	1.29	1.98457	1.52	5.3	84	174	0.69	4.27	0.74	1.32	2.93	0.309	88.473	24.27	6.757	57	61.3	0.012
467	0	0	0	1	1	3	10	20	2	114	2.04	0.08	10	6.8	40.4	3.74	2.43152	3.25	5.14	81	310	1.11	2.74	1.02	0.94	1.5	0.343	87.398	73.94	0.774	151	21	0.021
468	0	1	1	0	1	2	4	0	3	142	0.78	0.02	14	8	36.3	1.2	1.32118	0.32	5.2	64	320	0.81	3.43	2.1	1.14	1.94	0.332	113.196	29.63	0.1962	77	20.9	0.013
469	0	0	0	1	1	2	10	0.1	4	119	0.1	0.2	20	8.21	30.1	2.3	2.33664	2.82	10.06	146	422	3.06	4.29	1.34	1	3.05	0.233	33.25	73.96	2.53547	165	19.4	1.06
470	0	1	1	0	1	2	16	1	3	137	0.1	0.28	44	8	41	1.25	2.1294	2.26	4.2	60	374	1.17	3.62	1.61	1.55	1.61	0.428	105.35	28.2	0.7292	57	17	0.01
471	0	0	0	1	1	2	1	3	2	150	1.2	0.04	10	7.44	43.4	1.36	1.85126	1.13	8.28	141	420	2.1	7.44	5.79	0.99	3.68	0.133	50.74	40.91	0.7292	81	25	0.041
472	1	0	1	0	1	2	3	0.4	4	110	1.34	0.062	78	12.2	20	7.78	2.71896	15.08	9.43	137	283	1.62	9.27	2.54	1.2	6.02	0.184	9.48	149.7	6.757	81	18	0.032
473	0	1	1	1	1	3	17	0.3	4	105	2.53	0.04	105	12.6	31.6	4.16	2.75137	8.08	7	88	311	1.33	6.73	1.82	1.61	4.75	0.239	77.961	21.56	0.53171	197	17	0.012
474	0	1	0	1	0	2	2	0	4	114	3.1	0.11	70	8.7	42.4	0.71	1.58001	0.78	12.4	76	423	1.59	5.28	1.99	1.34	3.72	0.253	76.86	32.81	24.731	312	15.7	0.012
475	0	0	0	1	1	3	10	2	4	112	3.27	0.1	27	8.6	37.4	1.82	1.9815	0.32	12.3	75	315	1.11	4.11	0.93	0.97	2.63	0.236	92.152	73.94	0.35406	40	8	20.207
476	1	1	0	0	1	2	11	4	4	86	1.11	0.3	27	5.8	29.8	3.45	2.38959	3.46	26.31	717	392	3.91	4.64	1.57	1.17	2.82	0.252	9.48	83.82	25	149	11	0.115
477	1	0	1	0	1	3	20	30	2	102	23.46	0.43	18	5.8	37.2	0.39	2.82113	2.45	22.45	488	419	1.68	2.2	0.78	1.01	0.85	0.459	10.671	90.36	11.781	16	13	11.02
478	1	1	1	1	0	3	3	30	5	93	2.1	0.08	68	6.1	34.2	2.5	2.51055	4.58	22.3	378	375	3.06	6.28	1.05	1.73	4.3	0.275	10.374	62.63	2.047	530	13	0.01
